# Supplementary material for: Distinguishing Oligosaccharide Isomers Using Far-Infrared Ion Spectroscopy: Identification of Biomarkers for Inborn Errors of Metabolism
Source: PubMed Central journal article supplement (PMC10323868; doi:10.1021/acs.analchem.3c00363), 2023-06-21
Supplement: ac3c00363_si_001.pdf [file ac3c00363_si_001.pdf]

## Supporting information:

# Distinguishing oligosaccharide isomers using far-infrared ion spectroscopy - identification of biomarkers for inborn errors of metabolism

Rianne E. van Outersterp<sup>1</sup>, Pieter C. Kooijman<sup>1</sup>, Jona Merx<sup>2</sup>, Udo F.H. Engelke<sup>3</sup>, Nematollah Omidikia<sup>4</sup>, Mei-Lan H. Tonneijck<sup>1</sup>, Kas J. Houthuijs<sup>1</sup>, Giel Berden<sup>1</sup>, Tessa M.A. Peters<sup>3,5</sup>, Dirk J. Lefeber<sup>3,5</sup>, Michel A. A. P. Willemsen<sup>6</sup>, Jasmin Mecinovic<sup>7</sup>, Jeroen J. Jansen<sup>4</sup>, Karlien L.M. Coene<sup>3,8</sup>, Ron A. Wevers<sup>3</sup>, Thomas J. Boltje<sup>2</sup>, Jos Oomens<sup>1,9</sup>, Jonathan Martens<sup>1\*</sup>

<sup>1</sup>*Institute for Molecules and Materials, FELIX Laboratory, Radboud University, 6525 ED Nijmegen, The Netherlands*

<sup>2</sup>*Institute for Molecules and Materials, Synthetic Organic Chemistry, Radboud University, 6525 AJ Nijmegen, The Netherlands*

<sup>3</sup>*Department of Laboratory Medicine, Translational Metabolic Laboratory, Radboud University Medical Centre, 6525 GA Nijmegen, the Netherlands*

<sup>4</sup>*Department of Analytical Chemistry and Chemometrics, Institute for Molecules and Materials, Radboud University, 6525 AJ Nijmegen, The Netherlands*

<sup>5</sup>*Department of Neurology, Donders Institute for Brain, Cognition and Behaviour, Radboud University Medical Centre, 6500 HB, Nijmegen, The Netherlands*

<sup>6</sup>*Amalia Children's Hospital, Department of Pediatric Neurology & Donders Institute for Brain, Cognition and Behaviour, Radboud University Medical Centre, 6500 HB, Nijmegen, The Netherlands*

<sup>7</sup>*University of Southern Denmark, Department of Physics, Chemistry and Pharmacy, 5230 Odense, Denmark*

<sup>8</sup>*Department of Clinical Chemistry and Hematology, Elisabeth-TweeSteden Hospital, Tilburg, The Netherlands*

<sup>9</sup>*van't Hoff Institute for Molecular Sciences, University of Amsterdam, 1098XH Amsterdam, The Netherlands*

*\*corresponding author*

E-mail: jonathan.martens@ru.nl

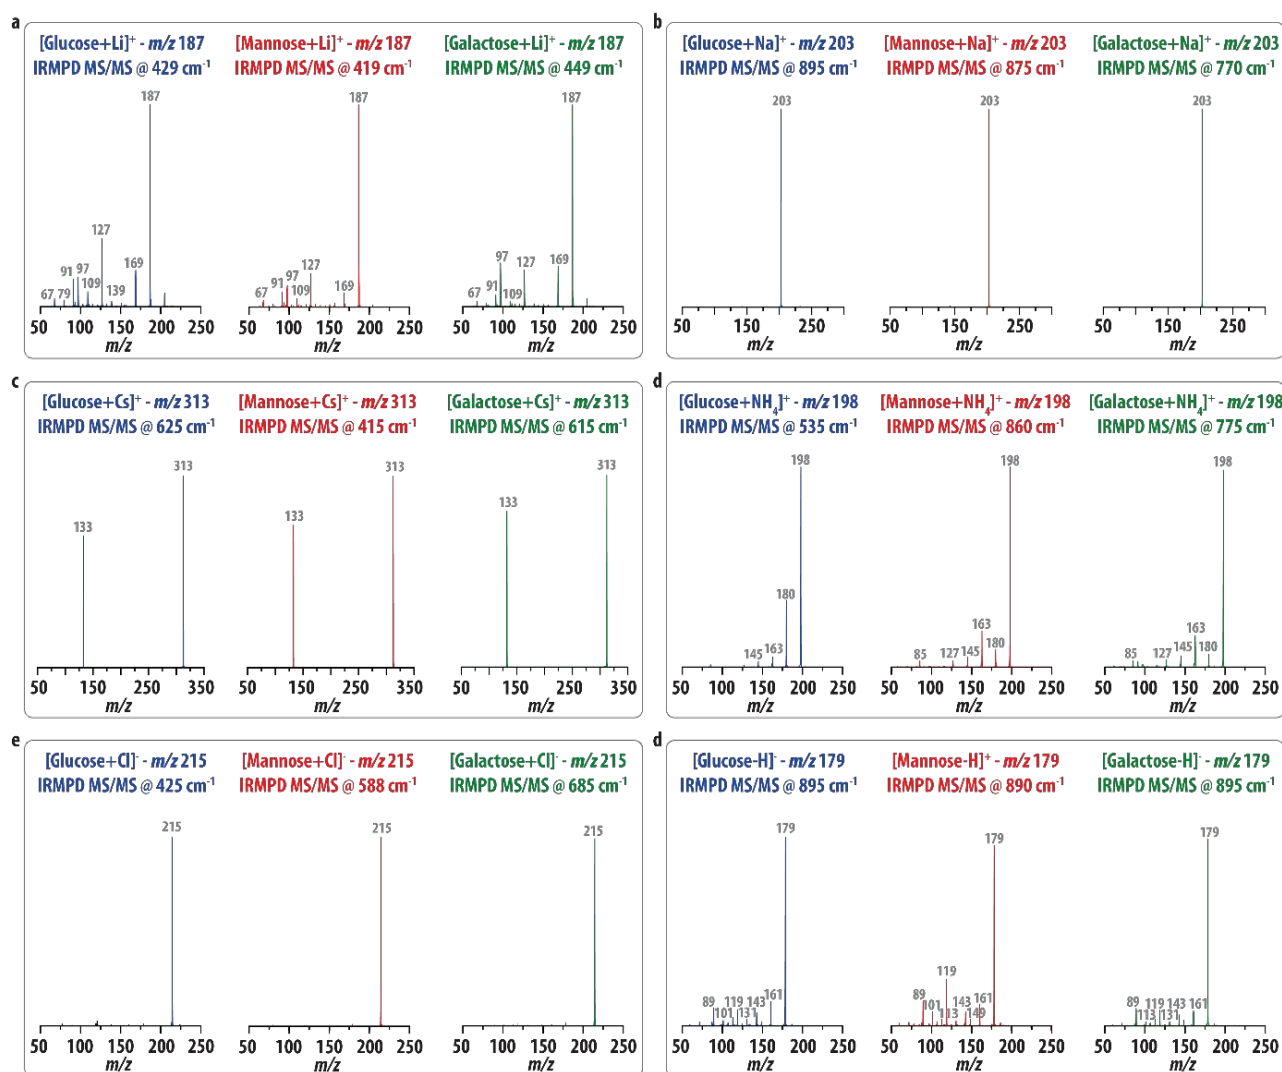

**Figure S1 |** IRMPD MS/MS spectra of the (a)  $[M+Li]^+$ , (b)  $[M+Na]^+$ , (c)  $[M+Cs]^+$ , (d)  $[M+NH_4]^+$ , (e)  $[M+Cl]^-$  and (f)  $[M-H]^-$  ions of D-glucose (blue), D-mannose (red) and D-galactose (green). The most important peaks are labeled with their  $m/z$  value. Irradiation wavelengths and precursor ion masses are mentioned above each spectrum.

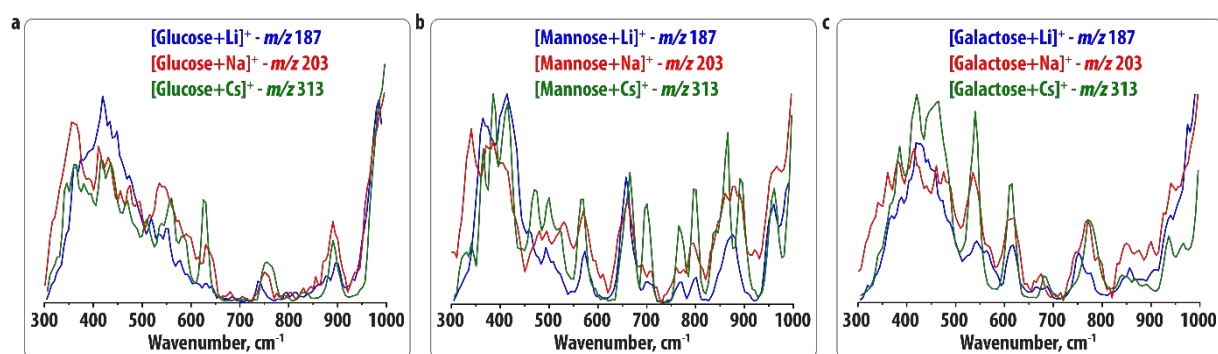

**Figure S2 |** Comparison of the experimental IR spectra of the  $[M+Li]^+$  (blue),  $[M+Na]^+$  (red) and  $[M+Cs]^+$  (green) adduct ions of (a) D-glucose, (b) D-mannose and (c) D-galactose

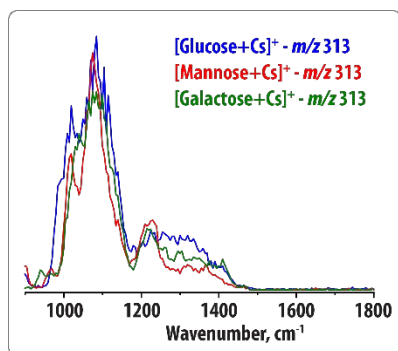

**Figure S3 |** Comparison of the experimental IR spectra of the  $[M+Cs]^+$  ions of D-glucose (blue), D-mannose (red) and D-galactose (green) in the fingerprint range

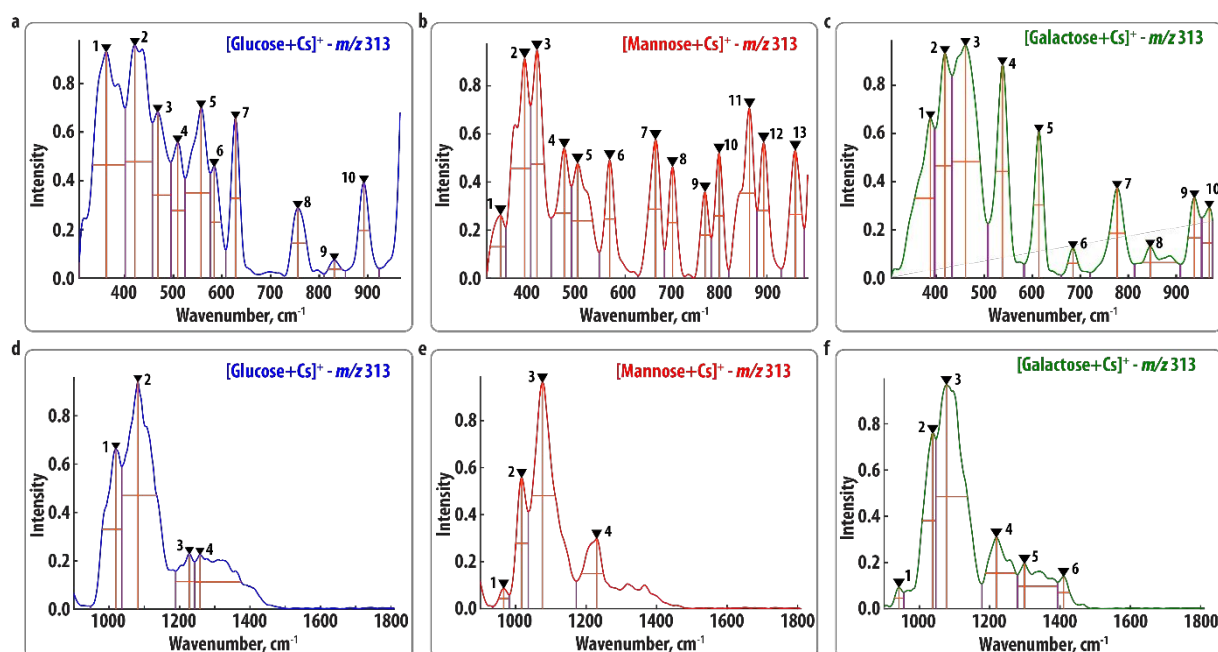

**Figure S4 |** Results of the application of a picking algorithm implemented in Matlab (see method section) to the experimental IR spectra of the  $[M+Cs]^+$  ions of D-glucose (blue), D-mannose (red) and D-galactose (green) in the far-IR (panel a-c,  $310-995\text{ cm}^{-1}$ ) and fingerprint (panel d-f,  $900-1845\text{ cm}^{-1}$ ) range. The position of each peak, its full width at half maximum (FWHM) and height is indicated in the figure and listed in Table S1.

**Table S1** | Peak position, full-width at half maximum (FWHM) and height of the peaks found by a picking algorithm implemented in Matlab (see method section in the main text) in the experimental IR spectra of the  $[M+Cs]^+$  ions of D-glucose (blue), D-mannose (red) and D-galactose (green) in the far-IR (310-995  $\text{cm}^{-1}$ ) and fingerprint (900-1845  $\text{cm}^{-1}$ ) range.

| IR spectrum               | Peak | Position ( $\text{cm}^{-1}$ ) | FWHM     | Height |
|---------------------------|------|-------------------------------|----------|--------|
| D-Glucose – far IR        | 1    | 362                           | 67.2369  | 0.9307 |
|                           | 2    | 421                           | 56.0000  | 0.9563 |
|                           | 3    | 468                           | 38.0000  | 0.6823 |
|                           | 4    | 509                           | 29.0000  | 0.5564 |
|                           | 5    | 557                           | 52.0000  | 0.7001 |
|                           | 6    | 584                           | 22.6463  | 0.4597 |
|                           | 7    | 628                           | 20.6544  | 0.6560 |
|                           | 8    | 756                           | 31.7961  | 0.2873 |
|                           | 9    | 831                           | 29.1086  | 0.0735 |
|                           | 10   | 892                           | 24.3378  | 0.3923 |
| D-Mannose – far IR        | 1    | 336                           | 14.7865  | 0.2615 |
|                           | 2    | 387                           | 12.1958  | 0.9136 |
|                           | 3    | 413                           | 70.4822  | 0.9476 |
|                           | 4    | 471                           | 22.5603  | 0.5396 |
|                           | 5    | 499                           | 13.5876  | 0.4767 |
|                           | 6    | 567                           | 19.2483  | 0.4916 |
|                           | 7    | 664                           | 26.8526  | 0.5746 |
|                           | 8    | 700                           | 16.8282  | 0.4627 |
|                           | 9    | 769                           | 14.0319  | 0.3579 |
|                           | 10   | 799                           | 19.2198  | 0.5188 |
|                           | 11   | 863                           | 26.6420  | 0.7065 |
|                           | 12   | 893                           | 15.0077  | 0.5640 |
|                           | 13   | 960                           | 19.5977  | 0.5302 |
| D-Galactose – far IR      | 1    | 386                           | 39.7460  | 0.6972 |
|                           | 2    | 419                           | 38.0000  | 0.9826 |
|                           | 3    | 459                           | 55.5392  | 0.9637 |
|                           | 4    | 539                           | 26.8362  | 0.8402 |
|                           | 5    | 613                           | 23.6461  | 0.5384 |
|                           | 6    | 683                           | 22.6031  | 0.1108 |
|                           | 7    | 776                           | 34.5542  | 0.3884 |
|                           | 8    | 844                           | 74.2698  | 0.1230 |
|                           | 9    | 937                           | 28.5776  | 0.2912 |
|                           | 10   | 966                           | 19.0000  | 0.2774 |
| d-Glucose – fingerprint   | 1    | 1019                          | 55.8106  | 0.6612 |
|                           | 2    | 1082                          | 99.3618  | 0.9404 |
|                           | 3    | 1228                          | 54.0000  | 0.2286 |
|                           | 4    | 1258                          | 132.2666 | 0.2253 |
| d-Mannose – fingerprint   | 1    | 966                           | 30.4995  | 0.0853 |
|                           | 2    | 1017                          | 35.5113  | 0.5570 |
|                           | 3    | 1076                          | 66.0083  | 0.9616 |
|                           | 4    | 1230                          | 62.9990  | 0.2977 |
| d-Galactose – fingerprint | 1    | 942                           | 26.8188  | 0.0922 |
|                           | 2    | 1038                          | 38.9887  | 0.7610 |
|                           | 3    | 1077                          | 89.6894  | 0.9703 |
|                           | 4    | 1219                          | 86.5107  | 0.3087 |
|                           | 5    | 1299                          | 114.0000 | 0.1951 |
|                           | 6    | 1410                          | 34.7855  | 0.1392 |

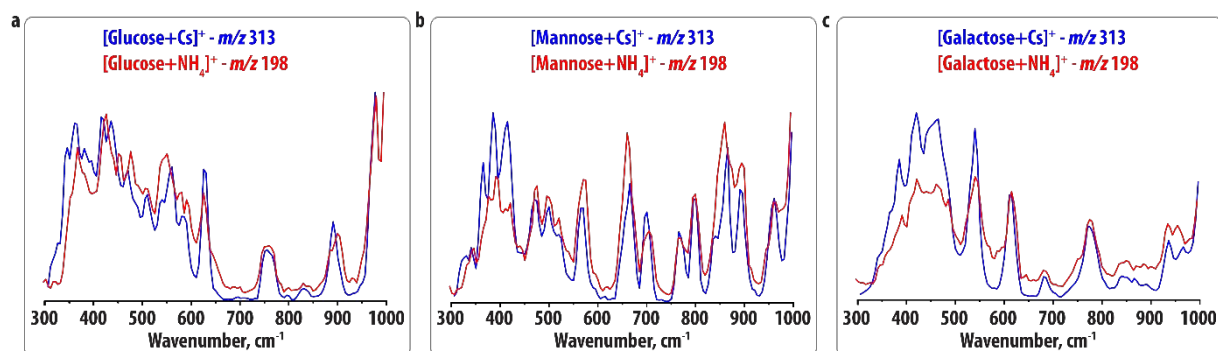

**Figure S5 |** Comparison of the experimental IR spectra of the  $[M+Cs]^+$  (blue) and  $[M+NH_4]^+$  adduct ions of (a) D-glucose, (b) D-mannose and (c) D-galactose

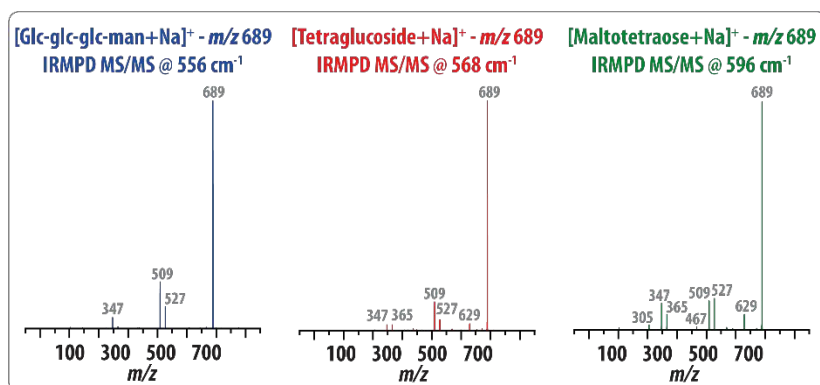

**Figure S6 |** IRMPD MS/MS spectra of the  $[M+Na]^+$  ions of D-Glc-glc-glc-man (blue), D-tetraglucoside (red) and D-maltotetraose (green). The most important peaks are labeled with their  $m/z$  value. Irradiation wavelengths and precursor ion masses are mentioned above each spectrum.

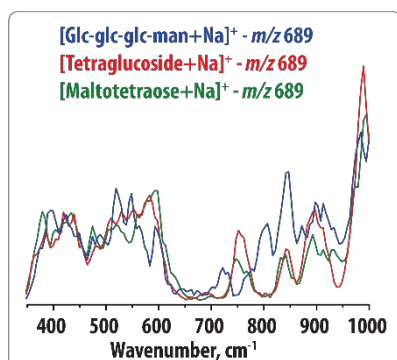

**Figure S7 |** Comparison of the experimental IR spectra of the  $[M+Cs]^+$  ions of D-Glc-glc-glc-man (blue), D-tetraglucoside (red) and D-maltotetraose (green).

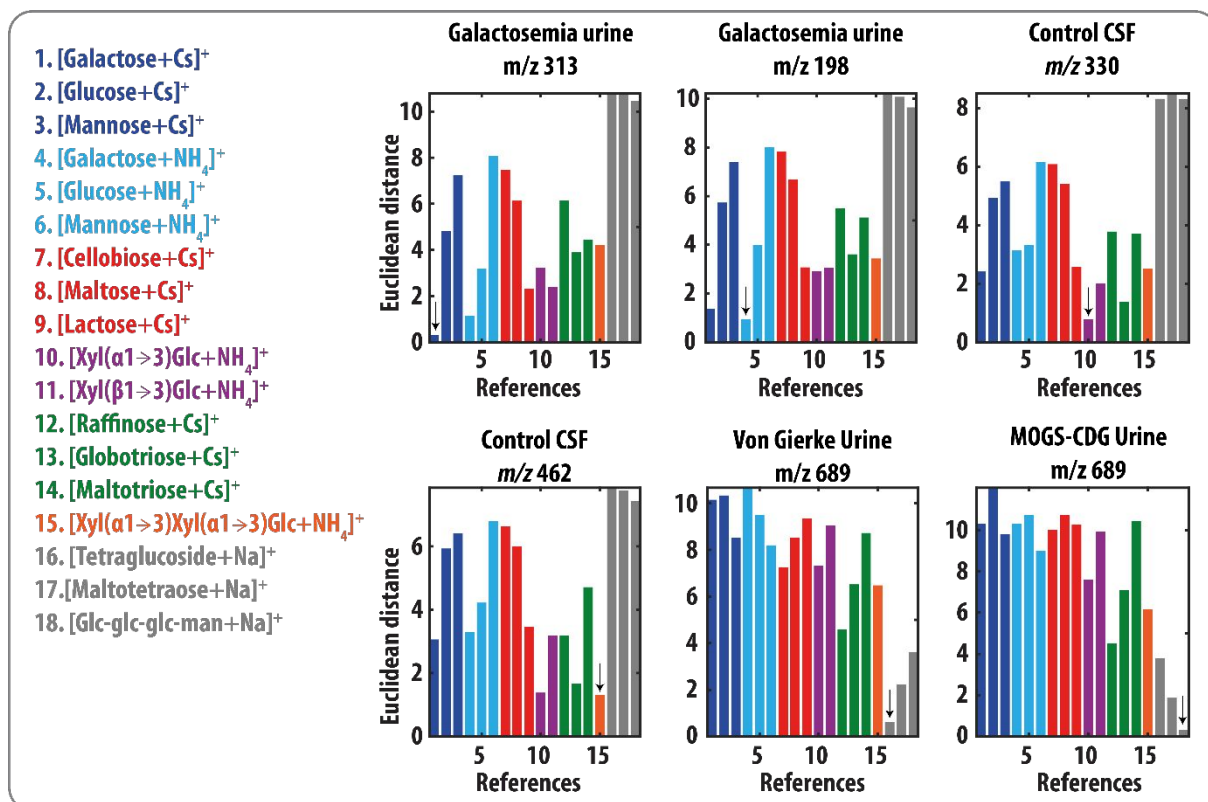

**Figure S8** | Euclidean distance between the IR spectra of the unknowns and the IR spectra of references in the PCA score plot shown in Figure 4a.

**Table S2** | Cosine similarity scores for each of the IR spectra measured from patient samples and all reported reference spectra. The highest score (in all cases the correct spectral match) for each patient ion is highlighted.

| Reference                                             | Galactosemia urine<br>m/z 313 | Galactosemia urine<br>m/z 198 | Control CSF<br>m/z 330 | Control CSF<br>m/z 462 | Von Gierke<br>Urine<br>m/z 689 | MOGS-CDG<br>Urine<br>m/z 689 |
|-------------------------------------------------------|-------------------------------|-------------------------------|------------------------|------------------------|--------------------------------|------------------------------|
| [Galactose+Cs] <sup>+</sup>                           | <b>0.9975</b>                 | 0.9370                        | 0.8606                 | 0.7334                 | 0.3343                         | 0.3613                       |
| [Glucose+Cs] <sup>+</sup>                             | 0.8204                        | 0.8338                        | 0.8552                 | 0.7330                 | 0.6078                         | 0.5276                       |
| [Mannose+Cs] <sup>+</sup>                             | 0.7282                        | 0.7633                        | 0.7935                 | 0.7173                 | 0.4724                         | 0.4731                       |
| [Galactose+NH <sub>4</sub> ] <sup>+</sup>             | 0.9500                        | <b>0.9957</b>                 | 0.9052                 | 0.8772                 | 0.5105                         | 0.5571                       |
| [Glucose+NH <sub>4</sub> ] <sup>+</sup>               | 0.8772                        | 0.9138                        | 0.8987                 | 0.8399                 | 0.6122                         | 0.5605                       |
| [Mannose+NH <sub>4</sub> ] <sup>+</sup>               | 0.6416                        | 0.7506                        | 0.7965                 | 0.8001                 | 0.6260                         | 0.6168                       |
| [Cellobiose+Cs] <sup>+</sup>                          | 0.5664                        | 0.6518                        | 0.6752                 | 0.6706                 | 0.7538                         | 0.6388                       |
| [Maltose+Cs] <sup>+</sup>                             | 0.6123                        | 0.6853                        | 0.7029                 | 0.6730                 | 0.7554                         | 0.6692                       |
| [Lactose+Cs] <sup>+</sup>                             | 0.8375                        | 0.8412                        | 0.8375                 | 0.7581                 | 0.5789                         | 0.5079                       |
| [Xyl(α1→3)Glc+NH <sub>4</sub> ] <sup>+</sup>          | 0.8229                        | 0.8765                        | <b>0.9880</b>          | 0.8634                 | 0.5830                         | 0.6451                       |
| [Xyl(β1→3)Glc+NH <sub>4</sub> ] <sup>+</sup>          | 0.7730                        | 0.8575                        | 0.8530                 | 0.8149                 | 0.7305                         | 0.7137                       |
| [Raffinose+Cs] <sup>+</sup>                           | 0.6562                        | 0.7880                        | 0.7976                 | 0.7477                 | 0.8157                         | 0.8438                       |
| [Globotriose+Cs] <sup>+</sup>                         | 0.7374                        | 0.8394                        | 0.8197                 | 0.7903                 | 0.7616                         | 0.7729                       |
| [Maltotriose+Cs] <sup>+</sup>                         | 0.7593                        | 0.8264                        | 0.8586                 | 0.7731                 | 0.6895                         | 0.6603                       |
| [Xyl(α1→3)Xyl(α1→3)Glc+NH <sub>4</sub> ] <sup>+</sup> | 0.7318                        | 0.8750                        | 0.8822                 | <b>0.9711</b>          | 0.6339                         | 0.7216                       |
| [Tetraglucoside+Na] <sup>+</sup>                      | 0.2892                        | 0.4588                        | 0.4894                 | 0.5215                 | <b>0.9837</b>                  | 0.8308                       |
| [Maltotetraose+Na] <sup>+</sup>                       | 0.3402                        | 0.5420                        | 0.5656                 | 0.6223                 | 0.9301                         | 0.9131                       |
| [Glc-glc-glc-man+Na] <sup>+</sup>                     | 0.3209                        | 0.4969                        | 0.5182                 | 0.5559                 | 0.8366                         | <b>0.9583</b>                |

**Table S3** / Computed IR frequencies for  $\alpha$ -D-Lactose in the far-IR range. The frequencies are scaled by 0.975.

| Frequency (cm <sup>-1</sup> ) | Intensity |
|-------------------------------|-----------|
| 310.739715                    | 7.1732    |
| 332.76399                     | 90.7672   |
| 351.76635                     | 6.8629    |
| 383.4280125                   | 3.2778    |
| 396.0651825                   | 21.7799   |
| 402.806235                    | 101.8971  |
| 407.345445                    | 60.402    |
| 427.35459                     | 2.7573    |
| 432.677115                    | 75.9205   |
| 441.746175                    | 31.5897   |
| 451.0044825                   | 59.3804   |
| 473.5948425                   | 19.0494   |
| 481.5260775                   | 16.114    |
| 520.412685                    | 6.5782    |
| 531.1873125                   | 87.5332   |
| 560.56728                     | 139.0864  |
| 589.158765                    | 22.9324   |
| 602.4210075                   | 33.9551   |
| 619.7843925                   | 86.7158   |
| 629.1264525                   | 15.5253   |
| 723.0140775                   | 18.398    |
| 730.5207975                   | 13.6715   |
| 777.3870975                   | 49.559    |
| 782.3311275                   | 18.8255   |
| 829.56237                     | 40.9843   |
| 829.963095                    | 4.7438    |
| 864.653595                    | 20.9267   |
| 882.7122525                   | 12.8404   |
| 914.9623275                   | 2.7233    |
| 922.1180475                   | 6.9848    |
| 949.1579175                   | 18.9186   |
| 978.87621                     | 9.3744    |
| 997.4367                      | 22.7698   |

**Table S4** | Computed IR frequencies for  $\alpha$ -D-Mannose in the far-IR range. The frequencies are scaled by 0.975.

| Frequency (cm <sup>-1</sup> ) | Intensity |
|-------------------------------|-----------|
| 352.76865                     | 86.9479   |
| 371.492355                    | 23.6935   |
| 387.3274275                   | 49.744    |
| 395.823285                    | 82.6924   |
| 450.6788325                   | 35.5527   |
| 468.358995                    | 11.6097   |
| 486.2164125                   | 131.1161  |
| 489.70779                     | 17.9423   |
| 558.37938                     | 19.5945   |
| 638.502345                    | 36.2313   |
| 663.66261                     | 38.5096   |
| 794.638455                    | 31.6353   |
| 829.578165                    | 24.0282   |
| 854.9356725                   | 17.2212   |
| 887.6633025                   | 27.8626   |
| 947.7578175                   | 28.0963   |
| 986.4579075                   | 91.3448   |

**Table S5** | Retention times of the 12 studied oligosaccharides. Details on the LC separation can be found in the method section of the main text.

| Oligosaccharide   | Retention time (minutes) |
|-------------------|--------------------------|
| D-Glucose         | 1.6                      |
| D-Galactose       | 1.6                      |
| D-Mannose         | 1.5                      |
| D-Cellobiose      | 3.2                      |
| D-Maltose         | 3.3                      |
| D-Lactose         | 3.5                      |
| D-Globotriose     | 5.2                      |
| D-Maltotriose     | 4.9                      |
| D-Raffinose       | 4.9                      |
| D-Tetraglucoside  | 6.3                      |
| D-Maltotetraose   | 6.0                      |
| D-Glc-glc-glc-man | 5.9                      |



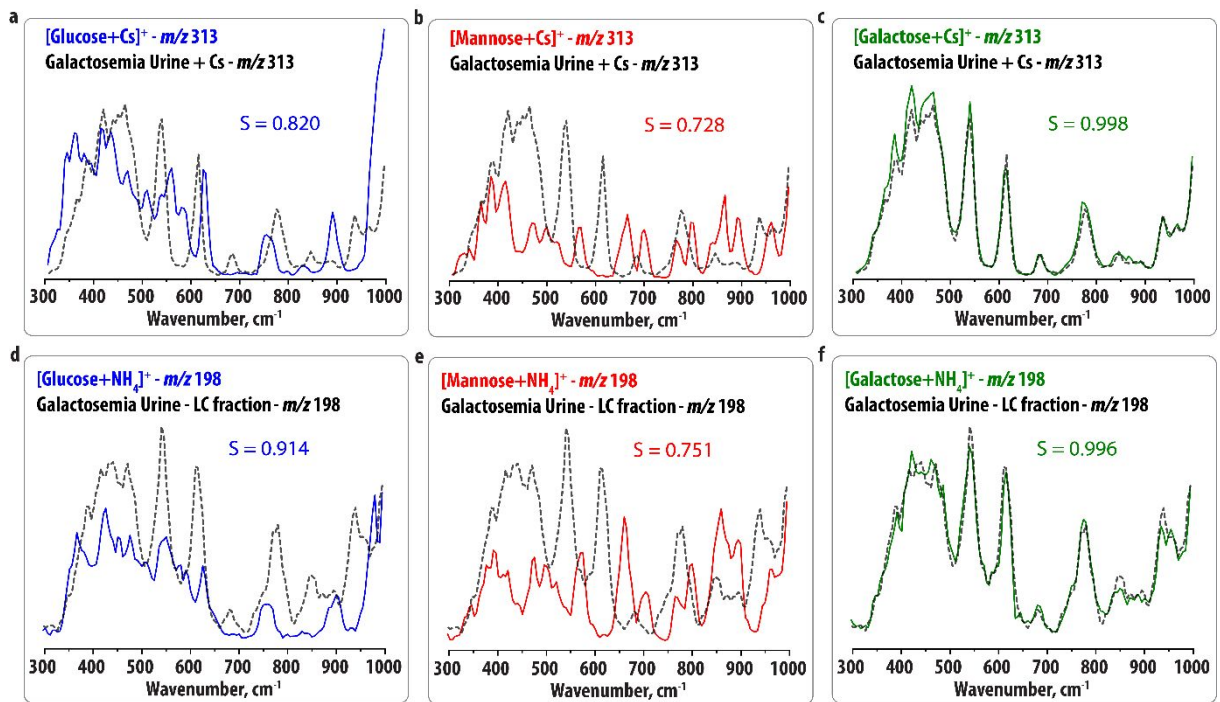

Figure S9 | Expanded presentation of Figure 1 data.

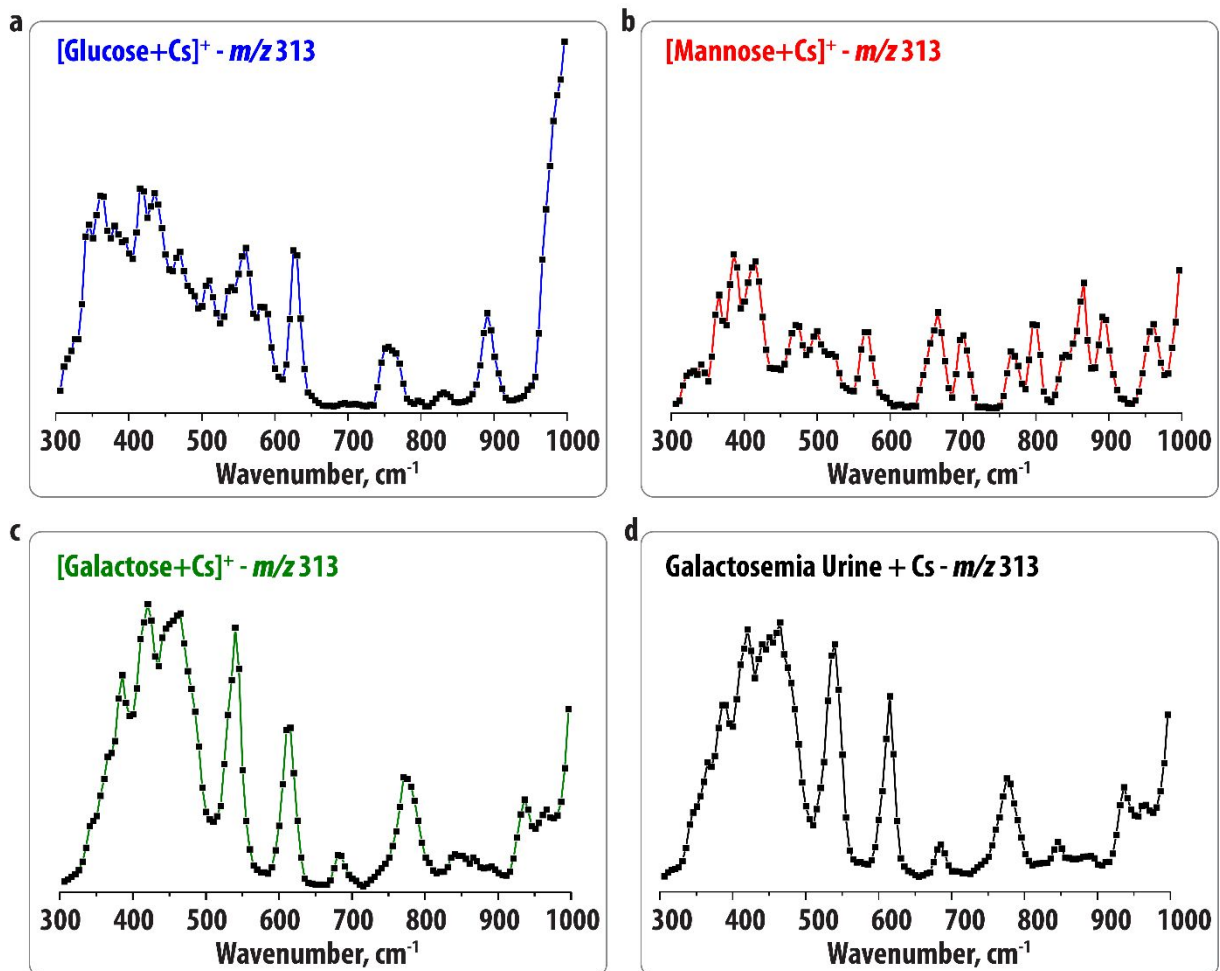

Figure S10 | Presentation of data with raw data points and traces.

## Extended Methods

### Chemicals

D-glucose, D-mannose, D-galactose, D-lactose, D-maltose, D-cellobiose, D-globotriose, D-raffinose, D-maltotriose, D-tetra-glucoside and D-maltotetraose reference standards were obtained from Sigma-Aldrich Chemie (Steinheim, Germany). Purified D-glc-glc-glc-man was obtained from the urine of a MOGS-CDG patient as described in Ref. <sup>1</sup>. Solvents used for diluting reference standards and urine samples and mobile phase solvents were prepared with ULC/MS grade acetonitrile (ACN), water (H<sub>2</sub>O) and methanol (MeOH) obtained from Biosolve (Valkenswaard, The Netherlands). Ammonium hydroxide (NH<sub>4</sub>OH) was obtained from VWR International (Fontenay-sous-Bois, France). Cesium chloride (CsCl), sodium chloride (NaCl) and lithium chloride (LiCl) were obtained from Sigma-Aldrich Chemie (Steinheim, Germany). LC-MS grade MeOH, ethanol (EtOH), H<sub>2</sub>O, and formic acid (HCOOH) used during the preparation of the CSF samples were obtained from Sigma-Aldrich (Steinheim, Germany). Reference standards for Xyl( $\alpha$ 1 $\rightarrow$ 3)-Glc, Xyl( $\beta$ 1 $\rightarrow$ 3)-Glc and Xyl( $\alpha$ 1 $\rightarrow$ 3)Xyl( $\alpha$ 1 $\rightarrow$ 3)Glc were synthesized in-house. Synthetic procedures are found below.

### Sample preparation

Commercially obtained reference compounds were analysed as  $\sim$  $\mu$ M solutions in 50:50 [v/v] MeOH:H<sub>2</sub>O with 10-100  $\mu$ M CsCl, LiCl or NaCl or 0.1% NH<sub>4</sub>OH. Synthetic standards were analysed as  $\sim$  $\mu$ M solutions in 0.1% NH<sub>4</sub>OH in 80:20 [v/v] MeOH:H<sub>2</sub>O. The urine samples (stored at -80 °C) were diluted 5-10 times in ACN and centrifuged at 18600 g for 20 minutes at 4 °C. The supernatant was analysed directly with LC-MS or spiked with 100  $\mu$ M CsCl for direct infusion experiments. The control CSF sample (stored at -80 °C) was thawed at 4 °C and 400  $\mu$ l of ice-cold MeOH/EtOH 50:50 [v/v] was added to 100  $\mu$ l of sample. The resulting sample was mixed for 15 s with a vortex mixer and incubated for 20 min at 4 °C. Subsequently, the sample was centrifuged for 15 min at 4 °C (18600 g) and the supernatant (350  $\mu$ l) was dried in a centrifugal evaporator. The sample was reconstituted in 100  $\mu$ l of H<sub>2</sub>O, mixed with a vortex mixer (15 s) and centrifuged (18600 g) at room temperature. The supernatant (90  $\mu$ l) was diluted with ACN and NH<sub>4</sub>OH to a final composition of 0.1% NH<sub>4</sub>OH in 80:20 [v/v] ACN:H<sub>2</sub>O and analysed with LC-MS. Body fluid quantification of D-glucose and D-galactose was performed with minor modification on the method described by Jansen et al.<sup>2</sup>

### HILIC separations

LC separations were performed with a Bruker Elute UHPLC system coupled to a quadrupole ion trap mass spectrometer (Bruker, AmaZon Speed). A Waters Acquity BEH amide column (100 x 2.1 mm i.d., 1.8 mm particles, 100 Å pore size) was used for all separations. For the analysis of the galactosemia urine sample, the column was held at a temperature of 30 °C and the mobile phase consisted of 0.1% NH<sub>4</sub>OH in 95:5 ACN:H<sub>2</sub>O (mobile phase A) and 0.1% NH<sub>4</sub>OH 50:50 ACN:H<sub>2</sub>O (mobile phase B). After an initial time of 1 minute at 100% A, a gradient was run to 100% B in 10 minutes. After a hold of 2 minutes at 100% B, the column was re-equilibrated for 14 minutes at 100% A. An injection volume of 5  $\mu$ l and a flow rate of 0.3 ml/min was used. For the analysis of the GLUT1DS CSF sample, the column was held at a temperature of 35 °C and the mobile phase consisted of 0.1% NH<sub>4</sub>OH in 80:20 ACN:H<sub>2</sub>O (mobile phase A) and 0.1% NH<sub>4</sub>OH 30:70 ACN:H<sub>2</sub>O (mobile phase B). A gradient was run to 100% B in 7 minutes and the column was re-equilibrated for 16 minutes at 100% A. An injection-volume of 2-20  $\mu$ l and a flow rate of 0.2 ml/min was used. The MOGS-CDG and Von Gierke disease samples were analysed using a flow rate of 0.6 ml/min and a mobile phase consisting of 0.1% NH<sub>4</sub>OH in 80:20 ACN:H<sub>2</sub>O (mobile phase A) and 0.1% NH<sub>4</sub>OH 80:20 MeOH:H<sub>2</sub>O (mobile phase B). After an initial time of 1 minute at 100% A, a gradient was run to 50% A in 8 minutes, followed by a gradient to 11.1% A in 2 minutes. After a hold of 1 minute at 11.1% A, the column was re-equilibrated for 4 minutes at 100% A. An injection volume of 10  $\mu$ l and a flow rate was used and the column was held at a temperature of 55 °C. Retention times of all reference standards reported in Table S5 were also measured using this separation method. Here, an injection volume of 5  $\mu$ l was used.

### Infrared Ion Spectroscopy

Solutions of reference standards and the diluted urine sample were introduced at 180  $\mu$ L h<sup>-1</sup> flow rates to the electrospray source using a syringe pump. Fractions of LC eluent were collected using a two-position six-port switching valve controlled by the quadrupole ion trap and an 80  $\mu$ L sample loop. In this set-up, the LC-eluent is diverted to waste by the switching valve until the peak of interest elutes. At that time, the valve is switched, storing the fraction of eluent in the sample loop. The valve switches back after the peak is eluted and the fraction is slowly infused by the syringe pump (120-180  $\mu$ L h<sup>-1</sup>).

Ions of interest were mass-isolated and stored for 180 ms in the ion trap to be irradiated with two macropulses of FELIX, which produced 300-1000 cm<sup>-1</sup> radiation in the form of 5-10  $\mu$ s macropulses of 10-80 mJ at 10 Hz repetition rate (bandwidth  $\sim$ 0.4% of the central frequency). Our IRIS experiments are based on infrared multiple-photon dissociation (IRMPD) spectroscopy: resonant absorption of IR laser light raises the internal energy of the ions and, after absorption of multiple photons, unimolecular dissociation can occur. The fractional amount of fragmentation is a measure for the degree of IR absorption at each wavelength point and an IR spectrum can be reconstructed by

relating the precursor and fragment ion intensities [IRIS intensity =  $\ln(\Sigma I(\text{precursor} + \text{fragment ions})/I(\text{precursor ion}))$ ] as a function of wavelength.<sup>3</sup> When no fragment ions are observed (because the fragments are below the low mass cut-off of the ion trap) the IR spectrum is plotted as a precursor depletion spectrum [IRIS intensity =  $\ln(I(\text{precursor, without irradiation})/I(\text{precursor}))$ ].<sup>3</sup> To obtain IR spectra, FELIX was scanned in 4 or 5  $\text{cm}^{-1}$  steps from  $\sim 10\text{--}34 \mu\text{m}$  and a fragmentation spectrum after irradiation was obtained as an average of 6-12 scans. The IRIS intensity was linearly corrected for frequency-dependent laser pulse energy variation.<sup>3</sup> No smoothing was applied.

### Quantum chemical calculations

In order to understand the general nature of the vibrations in the  $300\text{--}1000 \text{cm}^{-1}$  IR region, quantum-chemical calculations were performed using the Gaussian16 software package<sup>4</sup>. The lowest energy conformer was selected by performing a conformational search using a workflow described previously.<sup>5</sup> Geometry optimizations and (harmonic) IR frequency calculations were performed using density functional theory at the B<sub>3</sub>LYP/6-31++G(d,p) level of theory. Computational frequencies were scaled by 0.975. Among the lowest-energy structures resulting from the conformational search, the conformer was assigned that showed the best match between experimental and computational spectrum.

## Synthetic methods

<sup>1</sup>H and <sup>13</sup>C NMR spectra were recorded on a Bruker AVANCE III (500 MHz <sup>1</sup>H, 126 MHz <sup>13</sup>C) equipped with a Bruker Prodigy BB cryoprobe or a Bruker AVANCE III (400 MHz <sup>1</sup>H, 100 MHz <sup>13</sup>C) in the solvent indicated at room temperature. Chemical shifts are reported in  $\delta$  (ppm) units relative to the internal reference tetramethylsilane (Me<sub>4</sub>Si). For <sup>1</sup>H NMR spectra, the following abbreviations are used to describe multiplicities: s (singlet), d (doublet), t (triplet), bs (broad singlet), dd (double doublet), and m (multiplet). Coupling constants are reported in Hertz (Hz) as a *J* value. Thermo Scientific™ ISQ™, high resolution MS were recorded on AccuTOF CS JMS-T100CS. All compounds were routinely checked by TLC on silica gel 60 F254 (Merck, Darmstadt, Germany); spots were visualized under UV light (254 nm) and were stained with ninhydrin, 2-4-dinitrophenylhydrazine (DNP), cerium molybdate stain or aqueous KMnO<sub>4</sub> (depending on the reaction), followed by heating. R<sub>f</sub> values were obtained with the indicated solvent mixtures. All solvents were reagent grade and, when necessary, were purified and dried by standard methods. Organic solutions were dried over anhydrous sodium sulfate or anhydrous magnesium sulfate. The yields of the samples were calculated after drying the samples under high vacuum overnight or after lyophilization, yield corrected for residual solvents based on NMR integration. All commercially purchased reagents were used without further purification as delivered from the corresponding companies.

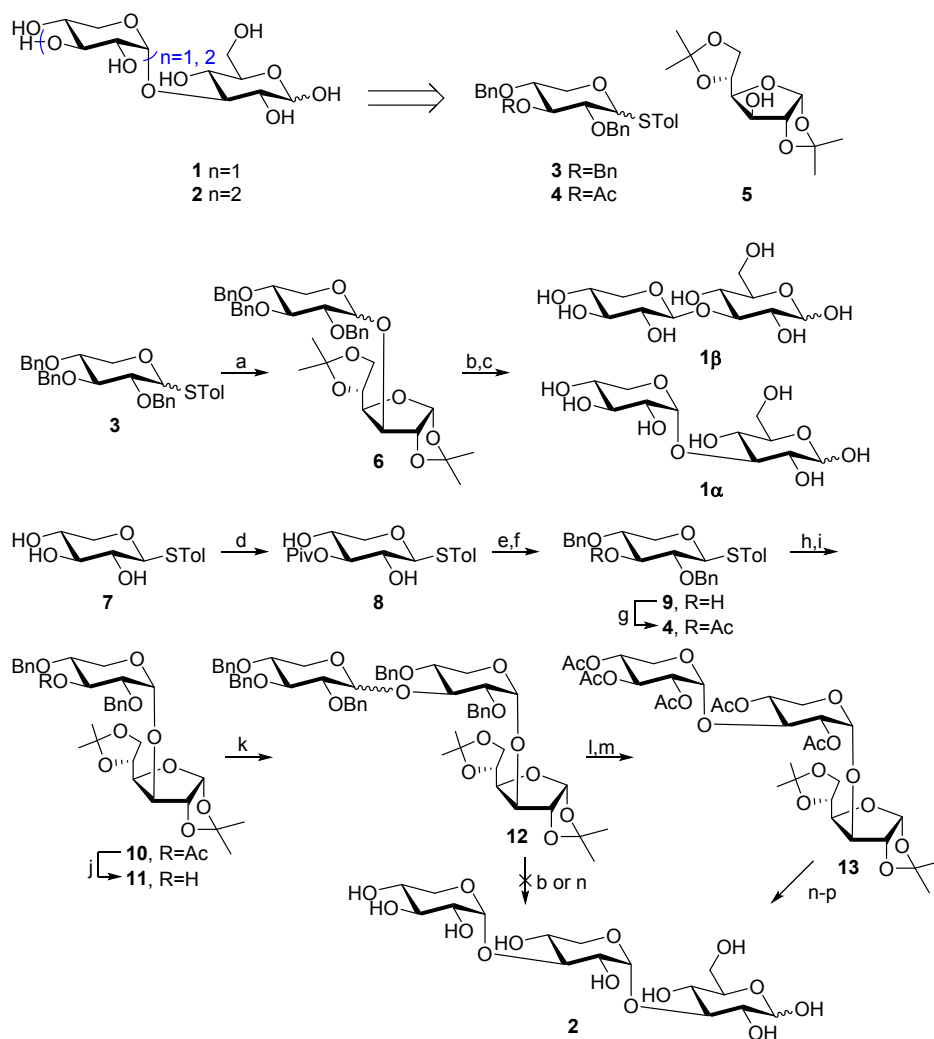

**Scheme 1.** Synthesis of biomarkers **1** and **2**. Reagent and conditions: **a**) **5**, NIS, TfOH, DCM:Et<sub>2</sub>O (3:1), -50 °C, **6 $\alpha$**  40%, **6 $\beta$**  29%; **b**) TFA:H<sub>2</sub>O (9:1); **c**) H<sub>2</sub>, Pd/C, MeOH, **1 $\alpha$**  45%, 12% **1 $\beta$**  over two steps; **d**) PivCl, DMAP, DCM:THF (4:1), 47%; **e**) BnBr, NaH, DMF; **f**) NaOMe, MeOH, 50 °C, 55% over two steps; **g**) Ac<sub>2</sub>O, TEA, DMAP, DCM, 96%; **h**) **5**, NIS, TfOH, DCM:Et<sub>2</sub>O (3:1), -50 °C, 85% (5:1,  $\alpha$ : $\beta$ ); **j**) K<sub>2</sub>CO<sub>3</sub>, MeOH, 53%,  $\alpha$  only; **k**) **3**, NIS, TfOH, DCM:Et<sub>2</sub>O (3:1), -50 °C, **12 $\alpha$ - $\alpha$**  59%, **12 $\beta$ - $\alpha$**  16%; **l**) H<sub>2</sub>, Pd/C, MeOH; **m**) Ac<sub>2</sub>O, DMAP, pyridine, 81% over two steps; **n**) AcOH:H<sub>2</sub>O (8:2), 95 °C; **o**) Ac<sub>2</sub>O, DMAP, pyridine; **p**) K<sub>2</sub>CO<sub>3</sub>, MeOH, 35% over three steps.

#### 4-methylphenyl 2,3,4-tri-O-acetyl-1-thio-D-xylopyranoside (**S1**)

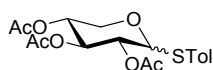

To an ice-cold solution of D-xylose (20.1 g, 134 mmol) in DCM (100 mL) and TEA (150 mL), was added DMAP (1.64 g, 13.4 mg). To this solution Ac<sub>2</sub>O (90 mL, 950 mmol) was added dropwise. The solution was allowed to warm up to rt and was stirred overnight. The reaction was quenched with H<sub>2</sub>O (200 mL), the layers were separated. The aqueous phase was extracted with DCM, the combined org layers were washed with 1 M HCl and sat. aq. NaHCO<sub>3</sub>, dried over MgSO<sub>4</sub> and concentrated *in vacuo*. The product was obtained as a thick oil in 97% yield (41.7 g, 130 mmol) with an 1:0.13 α:β ratio. Analytical data of major α anomer given. R<sub>f</sub> = 0.56 (1:1 EtOAc:heptane); <sup>1</sup>H NMR (400 MHz, Chloroform-*d*) δ 6.26 (d, *J* = 3.6 Hz, 1H), 5.46 (t, *J* = 9.8 Hz, 1H), 5.11 – 4.93 (m, 2H), 3.93 (dd, *J* = 11.2, 5.9 Hz, 1H), 3.78 – 3.64 (m, 1H), 2.17 (s, 3H), 2.05 (t, *J* = 1.1 Hz, 6H), 2.02 (s, 3H); <sup>13</sup>C NMR (101 MHz, Chloroform-*d*) δ 170.3, 169.91, 169.87, 169.2, 89.8, 69.5, 68.8, 60.8, 21.0, 20.9, 20.8, 20.6; HRMS (ESI<sup>+</sup>): calcd for C<sub>18</sub>H<sub>22</sub>NaO<sub>7</sub>S [M+Na]<sup>+</sup>: 405.0984, found: 405.0990.

#### 4-methylphenyl 1-thio-D-xylopyranoside (**S2**)

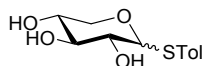

To a solution of **S1** (32.5 g, 102 mmol) in DCM (250 mL) was added thiocresol (19.0 g, 153 mmol). The reaction was cooled to 0 °C with an ice bath subsequently BF<sub>3</sub>·Et<sub>2</sub>O (20 mL, 160 mmol) was added. The colorless solution was allowed to warm up to rt and turned deep red overnight. The reaction was quenched with sat. aq. NaHCO<sub>3</sub> (200 mL), the layers were separated. The organic layer was washed with sat. aq. NaHCO<sub>3</sub>, dried over MgSO<sub>4</sub> and concentrated *in vacuo*. The crude product was dissolved in MeOH (250 mL) and NaOMe (5.4 M, 4.68 mL, 25.3 mmol) was added. Upon completion the resulting solution was concentrated *in vacuo* and recrystallized from toluene:acetone. The crystalline portion (7.06 g, 27.7mmol) contained α anomer of **7** only. The filtrate was concentrated *in vacuo* and filtered over Silica, washed with 1:1 EtOAc:heptane and concentrated *in vacuo* yielding an anomeric mixture of **7** (17.9 g, 70 mmol) with an α/β ratio of 0.5:1.0 resulting in a combined yield of 80%. R<sub>f</sub> = 0.11 (7:1 EtOAc:heptane); <sup>1</sup>H NMR (400 MHz, DMSO-*d*<sub>6</sub>, α anomer) δ 7.37 – 7.28 (m, 2H), 7.21 – 6.98 (m, 2H), 5.38 – 5.27 (m, 1H), 5.22 (s, 1H), 5.05 (d, *J* = 4.2 Hz, 1H), 4.51 (d, *J* = 9.2 Hz, 1H), 3.76 (dd, *J* = 11.1, 5.1 Hz, 1H), 3.31 – 3.23 (m, 1H), 3.17 (t, *J* = 8.4 Hz, 1H), 3.10 (dd, *J* = 11.1, 9.9 Hz, 1H), 3.02 (ddd, *J* = 11.1, 8.6, 3.1 Hz, 1H), 2.27 (s, 1H); <sup>13</sup>C NMR (101 MHz, DMSO-*d*<sub>6</sub>, α anomer) δ 136.5, 131.3, 130.2, 129.5, 88.1, 77.7, 71.9, 69.3, 69.1, 20.6; HRMS (ESI<sup>+</sup>): calcd for C<sub>12</sub>H<sub>16</sub>NaO<sub>4</sub>S [M+Na]<sup>+</sup>: 279.0667, found: 279.0669.

#### 4-methylphenyl 2,3,4-tri-O-benzyl-1-thio-D-xylopyranoside (**3**)

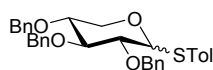

Thioglycoside **S2** (11.8 g, 46.0 mmol, anomeric mixture) was dissolved in DMF (200 mL). The solution was cooled to 0 °C and NaH (6.4 g, 161 mmol, 60 wt% dispersion in mineral oil) was added, followed by addition of BnBr (19.2 mL, 161 mmol). The solution was allowed to stir and warm up overnight to rt. The mixture was concentrated *in vacuo*, dissolved in EtOAc (200 mL) and washed 3x with H<sub>2</sub>O (200 mL). The organic layer was dried over MgSO<sub>4</sub> and concentrated *in vacuo* resulting in **3** obtained in 90% yield (21.9 g, 41.6 mmol). R<sub>f</sub> = 0.84 (7:1 EtOAc:heptane); <sup>1</sup>H NMR (500 MHz, Chloroform-*d*, mixture of anomers, CH<sub>3</sub> of STol set to 3.0) δ 7.44 – 7.27 (m, 17H), 7.10 (dd, *J* = 8.2, 2.5 Hz, 2H), 5.47 (d, *J* = 4.7 Hz, 0.4H), 4.97 – 4.80 (m, 2.7H), 4.80 – 4.67 (m, 2.4H), 4.67 – 4.56 (m, 1.7H), 4.12 – 4.00 (m, 1H), 3.85 – 3.74 (m, 0.8H), 3.71 – 3.54 (m, 2.1H), 3.44 – 3.38 (m, 0.7H), 3.27 – 3.18 (m, 0.7H), 2.33 (s, 3H); <sup>13</sup>C NMR (126 MHz, Chloroform-*d*, mixture of anomers) δ 138.9, 138.6, 138.3, 138.2, 138.0, 137.5, 132.8, 132.4, 129.90, 129.87, 128.64, 128.59, 128.57, 128.55, 128.49, 128.3, 128.23, 128.20, 128.1, 128.04, 128.02, 127.98, 127.95, 127.9, 127.8, 88.9, 87.9, 85.6, 81.8, 79.7, 77.9, 77.8, 75.9, 75.8, 75.6, 73.7, 73.4, 72.5, 67.7, 61.1, 21.3; HRMS (ESI<sup>+</sup>): calcd for C<sub>33</sub>H<sub>34</sub>NaO<sub>4</sub>S [M+Na]<sup>+</sup>: 549.2076, found: 549.2073.

#### 2,3,4-tri-O-benzyl-D-xylopyranosyl-(1-3)-1,2:5,6-di-O-isopropylidene-α-D-glucofuranose (**6**)

A solution of donor **3** (1.04 g, 1.98 mmol), acceptor **5** (619 mg, 2.38 mmol) and 3 Å molsieves in DCM:Et<sub>2</sub>O (40 mL, 3:1) was cooled to -78 °C and kept at this temperature for 30 minutes. To this solution NIS (490 mg, 2.12 mmol) was added and stirred for an additional 15 minutes while the solution warmed up to -60 °C. TfOH (17 μL, 198 μmol) was added; the solution turned dark red at -55 °C and after 30 min the reaction was quenched with TEA (110 μL, 792 μmol). The mixture was allowed to warm up to rt and was diluted with EtOAc. The organic phase was washed with sat. aq. NaHCO<sub>3</sub> and sat. aq. NaCl, dried over MgSO<sub>4</sub> and concentrated *in vacuo*. The mixture was repeatedly purified with column chromatography (0-10 % EtOAc in cyclohexane) yielding 40% of the α anomer **6a** (531 mg, 801 μmol), 29% of β anomer of **6b** (379 mg, 572 μmol) and 6% as mixture. Analytical data for **6a**: R<sub>f</sub> = 0.40 (3:7 EtOAc:heptane); <sup>1</sup>H NMR (500 MHz, Chloroform-*d*, α-anomer) δ 7.36 – 7.26 (m, 15H), 5.91 (d, *J* = 3.6 Hz, 1H), 5.14 (d, *J* = 3.5 Hz, 1H), 4.90 (d, *J* = 10.9 Hz, 1H), 4.85 (d, *J* = 10.9 Hz, 1H), 4.76 (d, *J* = 11.7 Hz, 2H), 4.71 (d, *J* = 11.8 Hz, 1H), 4.66 – 4.60 (m, 2H), 4.49 (ddd, *J* = 8.3, 6.2, 4.5 Hz, 1H), 4.19 (d, *J* = 2.8 Hz, 1H), 4.16 – 4.08 (m, 1H), 4.08 – 3.98 (m, 2H), 3.87 (dd, *J* = 9.6, 8.4

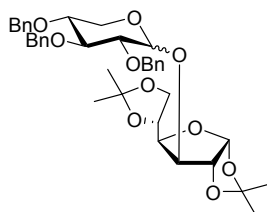

Hz, 1H), 3.75 – 3.69 (m, 1H), 3.62 – 3.50 (m, 2H), 3.46 (dd,  $J = 9.7, 3.5$  Hz, 1H), 1.50 (s, 3H), 1.41 (s, 3H), 1.31 (s, 3H), 1.24 (d,  $J = 1.0$  Hz, 3H);  $^{13}\text{C}$  NMR (126 MHz, Chloroform- $d$ ,  $\alpha$  anomer)  $\delta$  138.9, 138.4, 138.2, 128.7, 128.51, 128.50, 128.10, 128.08, 128.06, 127.8, 127.74, 127.67, 112.0, 109.3, 84.2, 81.4, 81.1, 80.5, 79.9, 78.1, 75.8, 74.0, 73.4, 72.4, 67.2, 61.1, 27.2, 27.0, 26.5, 25.6; HRMS (ESI $^{+}$ ): calcd for  $\text{C}_{38}\text{H}_{46}\text{NaO}_{10}$   $[\text{M}+\text{Na}]^{+}$ : 685.2989, found: 685.2968. Analytical data for **6 $\beta$** :  $R_f = 0.38$  (3:7 EtOAc:heptane);  $^1\text{H}$  NMR (500 MHz, Chloroform- $d$ ,  $\beta$ -anomer)  $\delta$  7.35 – 7.26 (m, 15H), 5.72 (d,  $J = 3.8$  Hz, 1H), 4.88 (d,  $J = 11.0$  Hz, 1H), 4.84 (d,  $J = 11.1$  Hz, 1H), 4.74 (d,  $J = 11.2$  Hz, 1H), 4.71 (d,  $J = 11.7$  Hz, 1H), 4.68 (d,  $J = 11.2$  Hz, 1H), 4.62 (d,  $J = 11.7$  Hz, 1H), 4.48 (d,  $J = 3.8$  Hz, 1H), 4.41 (d,  $J = 7.6$  Hz, 1H), 4.38 – 4.30 (m, 2H), 4.27 (d,  $J = 3.1$  Hz, 1H), 4.05 – 4.02 (m, 2H), 3.95 (dd,  $J = 11.7, 5.0$  Hz, 1H), 3.66 – 3.54 (m, 2H), 3.30 (dd,  $J = 8.8, 7.5$  Hz, 1H), 3.19 (dd,  $J = 11.7, 9.5$  Hz, 1H), 1.47 (s, 3H), 1.43 (s, 3H), 1.35 (s, 3H), 1.23 (s, 3H);  $^{13}\text{C}$  NMR (126 MHz, Chloroform- $d$ ,  $\beta$  anomer)  $\delta$  136.7, 138.3, 138.2, 128.65, 128.62, 128.5, 128.08, 128.05, 128.00, 127.95, 127.8, 127.7, 112.0, 108.8, 105.2, 102.0, 83.9, 82.6, 81.7, 80.28, 80.24, 77.9, 75.7, 75.2, 73.49, 73.44, 66.2, 64.2, 26.81, 26.78, 26.2, 25.6. HRMS (ESI $^{+}$ ): calcd for  $\text{C}_{38}\text{H}_{46}\text{NaO}_{10}$   $[\text{M}+\text{Na}]^{+}$ : 685.2989, found: 685.2962.

#### D-xylose-( $\alpha$ 1-3)-D-glucopyranose (**1 $\alpha$** )

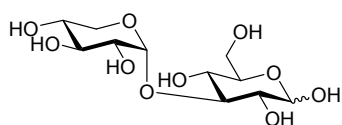

To a solution of **6 $\alpha$**  (494 mg, 745  $\mu\text{mol}$ ) in DCM (1.0 mL) was added TFA:H $_2$ O (10 mL, 9:1). The reaction was stirred at rt for 15 minutes and subsequently rapidly concentrated *in vacuo*. The residue was purified with column chromatography (80 % EtOAc in cyclohexane) resulting in a white foam (196 mg,  $R_f = 0.15$  (4:1, EtOAc:heptane)).

The product was dissolved in MeOH:H $_2$ O (32 mL, 15:1) and purged with Argon. Pd/C (36 mg, 33.9  $\mu\text{mol}$ ) was added, and the atmosphere was exchanged for H $_2$ . After 16 h, the reaction mixture was filtered over Celite, concentrated *in vacuo*. The residue was purified with column chromatography (0-20%, H $_2$ O:MeCN) and the product was lyophilized resulting in a fluffy white solid in 45% yield (105 mg, 336  $\mu\text{mol}$ ).  $R_f = 0.35$  (1:4, H $_2$ O:MeCN);  $^1\text{H}$  NMR (500 MHz, D $_2$ O, mixture of anomers, H1' s of Xylose set to 1.0)  $\delta$  5.30 – 5.25 (m, 1H), 5.17 (d,  $J = 3.8$  Hz, 0.28H), 4.59 (d,  $J = 8.0$  Hz, 0.82H), 3.85 – 3.74 (m, 3.4H), 3.72 – 3.45 (m, 9.25H), 3.44 – 3.37 (m, 6H), 3.31 – 3.24 (m, 0.5H);  $^{13}\text{C}$  NMR (126 MHz, D $_2$ O)  $\delta$  99.1, 99.0, 96.0, 92.3, 81.7, 79.7, 75.7, 73.0, 72.7, 71.67, 71.60, 71.2, 70.1, 70.0, 69.36, 69.35, 61.5, 60.5, 60.4; HRMS (ESI $^{+}$ ): calcd for  $\text{C}_{11}\text{H}_{20}\text{NaO}_{10}$   $[\text{M}+\text{Na}]^{+}$ : 335.0954, found: 335.0942.

#### D-xylose-( $\beta$ 1-3)-D-glucopyranose (**1 $\beta$** )

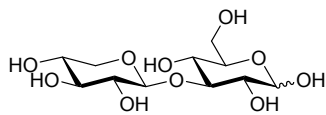

Deprotection of **6 $\beta$**  (365 mg, 551  $\mu\text{mol}$ ) analogous to **6 $\alpha$**  resulted in a fluffy white solid of **1 $\beta$**  obtained in 11% yield (36 mg, 62  $\mu\text{mol}$ ).  $R_f = 0.18$  (1:4, H $_2$ O:MeCN);  $^1\text{H}$  NMR (400 MHz, D $_2$ O,  $\alpha$ -H1 of Glucose set to 0.25)  $\delta$  5.16 (d,  $J = 3.8$  Hz, 0.25H), 4.62 – 4.53 (m, 0.77H), 3.96 – 3.87 (m, 0.5H), 3.85 – 3.74 (m, 1H), 3.73 – 3.53 (m, 1.65H), 3.47 – 3.33 (m, 1.50H), 3.31 – 3.20 (m, 1H);  $^{13}\text{C}$  NMR (101 MHz, D $_2$ O)  $\delta$  103.6, 103.5, 95.7, 92.0, 84.3, 82.1, 75.65, 75.62, 75.59, 73.8, 73.41, 73.37, 71.3, 71.1, 69.2, 68.03, 67.97, 65.2, 60.7, 60.5; HRMS (ESI $^{+}$ ): calcd for  $\text{C}_{11}\text{H}_{20}\text{NaO}_{10}$   $[\text{M}+\text{Na}]^{+}$ : 335.0954, found: 335.0947.

#### 4-methylphenyl 3-O-pivaloyl-1-thio- $\beta$ -D-xylopyranoside (**8**)

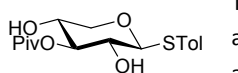

To a cooled solution of thioglycoside **52** (3.92 g, 15.3 mmol,  $\beta$  only) in DCM:THF (4:1, 150 ml) were added DMAP (2.24 g, 18.4 mmol) and Piv-Cl (2.07 mL, 16.8 mmol). The solution was warmed to reflux, and kept at this temperature for 1.5 h. The reaction was quenched with the addition of sat. aq. NaHCO $_3$  (100 mL) and the layers were separated. The aqueous layer was extracted with DCM (3 x 20 mL), the combined organic layers were dried over MgSO $_4$  and concentrated *in vacuo*. The residue was purified by column chromatography (10% EtOAc in heptane) resulting in 47% yield of **8** as a white solid (2.47g, 7.26 mmol).  $R_f = 0.15$  (3:7 EtOAc:heptane);  $^1\text{H}$  NMR (500 MHz, Chloroform- $d$ )  $\delta$  7.43 (d,  $J = 8.2$  Hz, 2H), 7.14 (dt,  $J = 7.9, 0.8$  Hz, 2H), 4.81 (t,  $J = 7.6$  Hz, 1H), 4.69 (d,  $J = 7.5$  Hz, 1H), 4.23 (dd,  $J = 11.9, 4.5$  Hz, 1H), 3.81 – 3.70 (m, 1H), 3.60 (td,  $J = 7.5, 4.3$  Hz, 1H), 3.41 (dd,  $J = 11.9, 8.3$  Hz, 1H), 2.76 (d,  $J = 4.3$  Hz, 1H), 2.67 (d,  $J = 5.2$  Hz, 1H), 2.35 (s, 3H), 1.26 (s, 9H);  $^{13}\text{C}$  NMR (101 MHz, Chloroform- $d$ )  $\delta$  179.7 (HMBC), 133.2, 130.0, 89.7, 70.2, 68.5, 67.8, 27.2, 21.3; HRMS (ESI $^{+}$ ): calcd for  $\text{C}_{17}\text{H}_{24}\text{NaO}_5\text{S}$   $[\text{M}+\text{Na}]^{+}$ : 363.1242, found: 363.1242.

#### 4-methylphenyl 2,4-di-O-benzyl-1-thio- $\beta$ -D-xylopyranoside (**9**)

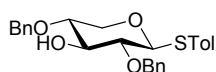

The pivaloate **8** (2.15 g, 6.32 mmol) was dissolved in DMF (30 mL), NaH (760 mg, 18.9 mmol, 60 wt% dispersion in mineral oil) was added. To this mixture BnBr (3.76 mL, 31.6 mmol) was added dropwise. The mixture was stirred overnight, quenched with the addition of sat. aq. NH $_4$ Cl (1 mL) and concentrated *in vacuo*. The solution was taken up in EtOAc, washed with H $_2$ O, sat. aq. NaHCO $_3$  and sat. aq. NaCl. The organic layer was dried over MgSO $_4$  and concentrated *in vacuo*. The crude mixture was dissolved in MeOH. NaOMe (1.58 mL, 8.26 mmol, 5.3 M in MeOH) was added to this solution and warmed to 50  $^{\circ}\text{C}$  overnight. The reaction was quenched with sat. aq. NH $_4$ Cl (1 mL), diluted with H $_2$ O and EtOAc. The layers were separated, the aqueous layer was extracted with EtOAc. The

combined organic layers were washed with sat. aq. NaCl, dried over MgSO<sub>4</sub> and concentrated *in vacuo*. The residue was purified by column chromatography (0-30% EtOAc in heptane) resulting in **9** as a white solid in 59% yield (1.63 g, 3.73 mmol) over two steps. *R<sub>f</sub>* = 0.34 (30% EtOAc in heptane); <sup>1</sup>H NMR (400 MHz, Chloroform-*d*) δ 7.43 (dd, *J* = 8.2, 1.9 Hz, 4H), 7.40 – 7.27 (m, 8H), 7.15 – 7.07 (m, 2H), 4.93 (d, *J* = 10.9 Hz, 1H), 4.75 (d, *J* = 10.9 Hz, 1H), 4.69 (d, *J* = 11.8 Hz, 1H), 4.63 (d, *J* = 11.8 Hz, 1H), 4.56 (d, *J* = 9.6 Hz, 1H), 4.02 (dd, *J* = 11.4, 5.2 Hz, 1H), 3.71 (td, *J* = 8.8, 2.3 Hz, 1H), 3.49 (ddd, *J* = 10.2, 8.9, 5.1 Hz, 1H), 3.30 (dd, *J* = 9.6, 8.7 Hz, 1H), 3.18 (dd, *J* = 11.5, 10.2 Hz, 1H), 2.51 (d, *J* = 2.3 Hz, 1H), 2.34 (s, 3H); <sup>13</sup>C NMR (101 MHz, Chloroform-*d*) δ 138.3, 138.2, 138.1, 132.8, 129.9, 129.8, 128.71, 128.69, 128.3, 128.15, 128.12, 128.0, 80.6, 78.0, 77.4, 75.3, 73.2, 67.6, 21.3; HRMS (ESI<sup>+</sup>): calcd for C<sub>26</sub>H<sub>28</sub>NaO<sub>4</sub>S [M+Na]<sup>+</sup>: 459.1606, found: 459.1604.

#### 4-methylphenyl 3-O-acetyl-2,4-di-O-benzyl-1-thio-β-D-xylopyranoside (**10**)

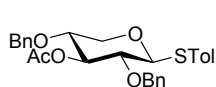

The thioglycoside **9** (1.87 g, 4.28 mmol) was dissolved in DCM (20.0 mL) and the solution was cooled to 0 °C. To this solution TEA (890 μL, 6.43 mmol), Ac<sub>2</sub>O (525 μL, 5.57 mmol) and a catalytic amount of DMAP (52.3 mg, 0.43 mmol) were added. The solution was allowed to warm up to rt and was

stirred for 3 h. The reaction mixture was quenched with H<sub>2</sub>O, the layers were separated. The organic layer was washed with sat. aq. NaHCO<sub>3</sub> and 1 M HCl. The combined organic layers were dried over MgSO<sub>4</sub> and concentrated *in vacuo*. Purification of the residue with column chromatography resulted in **4** obtained as white solid in 96% yield (1.98 g, 4.28 mmol). *R<sub>f</sub>* = 0.42 (30% EtOAc in heptane); <sup>1</sup>H NMR (400 MHz, Chloroform-*d*) δ 7.44 – 7.38 (m, 2H), 7.36 – 7.21 (m, 10H), 7.16 – 7.08 (m, 2H), 5.20 (t, *J* = 8.8 Hz, 1H), 4.85 (d, *J* = 11.0 Hz, 1H), 4.66 (d, *J* = 9.1 Hz, 1H), 4.60 – 4.48 (m, 3H), 4.06 (dd, *J* = 11.6, 5.1 Hz, 1H), 3.52 (ddd, *J* = 9.8, 8.9, 5.0 Hz, 1H), 3.39 (t, *J* = 8.9 Hz, 1H), 3.29 (dd, *J* = 11.6, 9.8 Hz, 1H), 2.34 (s, 3H), 1.93 (s, 3H); <sup>13</sup>C NMR (101 MHz, Chloroform-*d*) δ 170.0, 138.2, 138.0, 137.9, 132.8, 129.9, 129.7, 128.61, 128.55, 128.2, 128.1, 128.0, 127.9, 88.8, 78.8, 76.0, 75.3, 74.8, 72.8, 67.3, 21.3, 21.1; HRMS (ESI<sup>+</sup>) calcd for C<sub>28</sub>H<sub>30</sub>NaO<sub>5</sub>S [M+Na]<sup>+</sup>: 501.1712, found: 501.1710.

#### 2,4-di-O-benzyl-β-D-xylopyranoside-(α1-3)-1,2:5,6-di-O-isopropylidene-α-D-glucofuranose (**11**)

A solution of donor **4** (920 mg, 1.92 mmol), acceptor **5** (600 mg, 2.31 mmol) and 3 Å molsieves in DCM:Et<sub>2</sub>O (40 mL, 3:1) was

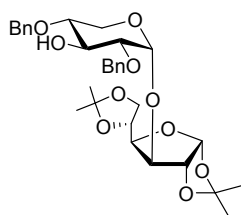

cooled to -78 °C and kept at this temperature for 30 minutes. To this solution NIS (476 mg, 2.11 mmol) was added and stirred for an additional 15 minutes while the solution warmed up to -60 °C. TfOH (17 μL, 198 μmol) was added; the solution turned dark red at -52 °C and after 30 min the reaction was quenched with TEA (107 μL, 769 μmol). The mixture was allowed to warm up to rt and was diluted with EtOAc. The organic phase was washed with sat. aq. NaHCO<sub>3</sub> and sat. aq. NaCl, dried over MgSO<sub>4</sub> and concentrated *in vacuo*. The mixture was purified with column chromatography (0-15% EtOAc in cyclohexane) yielding an inseparable mixture of anomers in a

4:1 α:β ratio (1.01 g, 1.64 mmol, *R<sub>f</sub>* = 0.32 (3:7 EtOAc:heptane)). To a solution of the anomeric mixture (1.0 g, in 1.64 mmol) in MeOH (10 mL) was added solid K<sub>2</sub>CO<sub>3</sub> (45 mg, 0.33 mmol). The reaction was stirred at rt for 2 h, the solution was neutralized with Amberlyst (15 hydrogen form), filtered and concentrated *in vacuo*. The residue was purified with column chromatography (0-16% EtOAc in cyclohexane) resulting in the isolation of the α anomer as a white solid in 53% yield (491 mg, 0.85 mmol). *R<sub>f</sub>* = 0.27 (3:7 EtOAc:heptane); <sup>1</sup>H NMR (500 MHz, Chloroform-*d*) δ 7.39 – 7.27 (m, 10H), 5.88 (d, *J* = 3.6 Hz, 1H), 5.15 (d, *J* = 3.5 Hz, 1H), 4.87 – 4.74 (m, 2H), 4.67 – 4.60 (m, 2H), 4.59 (d, *J* = 3.6 Hz, 1H), 4.46 (ddd, *J* = 8.5, 6.2, 4.4 Hz, 1H), 4.17 (d, *J* = 2.8 Hz, 1H), 4.08 (dd, *J* = 8.6, 2.8 Hz, 1H), 4.06 – 3.96 (m, 3H), 3.75 – 3.65 (m, 1H), 3.57 – 3.44 (m, 2H), 3.33 (dd, *J* = 9.7, 3.5 Hz, 1H), 2.50 (d, *J* = 2.0 Hz, 1H), 1.49 (s, 3H), 1.42 (s, 3H), 1.31 (s, 3H), 1.24 (s, 3H); <sup>13</sup>C NMR (126 MHz, Chloroform-*d*) δ 138.3, 138.0, 128.7, 128.13, 128.10, 128.06, 127.8, 112.1, 109.3, 105.3, 97.6, 84.1, 81.4, 80.7, 79.3, 77.5, 73.6, 72.9, 72.7, 72.3, 67.3, 60.6, 27.2, 27.0, 26.4, 25.6; HRMS (ESI<sup>+</sup>): calcd for C<sub>31</sub>H<sub>40</sub>NaO<sub>10</sub> [M+Na]<sup>+</sup>: 595.2519, found: 595.2502.

#### 2,3,4-tri-O-benzyl-D-xylopyranoside-(1-3)-2,4-di-O-benzyl-D-xylopyranoside-(α1-3)-1,2:5,6-di-O-isopropylidene-α-D-glucofuranose (**12**)

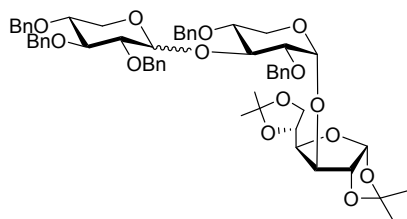

A solution of donor **3** (542 mg, 1.03 mmol), acceptor **10** (491 mg, 857 μmol) and 3 Å molsieves in DCM:Et<sub>2</sub>O (40 mL, 3:1) was cooled to -78 °C and kept at this temperature for 30 minutes. To this solution NIS (212 mg, 0.94 mmol) was added and stirred for an additional 15 minutes while the solution warmed up to -60 °C. TfOH (7 μL, 86 μmol) was added; the solution turned dark red at -55 °C and after 30 min the reaction was quenched with TEA (120 μL, 857 μmol). The mixture was allowed to warm up to rt and was diluted with EtOAc. The organic phase was washed with sat. aq. NaHCO<sub>3</sub> and sat. aq. NaCl, dried over MgSO<sub>4</sub> and

concentrated *in vacuo*. The mixture was purified with repeated column chromatography (0-15% EtOAc in heptane) resulting in the isolation of the desired α-α anomer **12a-a** as white solid in 59% yield (497 mg, 510 μmol) and isolation of the β-α



anomer **12 $\beta$ - $\alpha$**  in 16% yield (137 mg, 140  $\mu$ mol). Analytical data given of the desired  $\alpha$ - $\alpha$  anomer.  $R_f$  = 0.33 (3:7 EtOAc:heptane);  $^1\text{H}$  NMR (500 MHz, Chloroform- $d$ )  $\delta$  7.41 – 7.14 (m, 28H), 5.92 (d,  $J$  = 3.6 Hz, 1H), 5.57 (d,  $J$  = 3.6 Hz, 1H), 5.13 (d,  $J$  = 3.5 Hz, 1H), 4.88 (s, 2H), 4.73 (d,  $J$  = 11.5 Hz, 1H), 4.69 (d,  $J$  = 11.6 Hz, 1H), 4.65 (d,  $J$  = 12.0 Hz, 1H), 4.64 – 4.54 (m, 4H), 4.48 (d,  $J$  = 11.7 Hz, 1H), 4.46 – 4.41 (m, 1H), 4.18 – 4.09 (m, 3H), 4.06 – 3.99 (m, 2H), 3.95 – 3.88 (m, 2H), 3.76 – 3.64 (m, 2H), 3.58 – 3.46 (m, 4H), 3.44 (dd,  $J$  = 9.7, 3.6 Hz, 1H), 1.49 (s, 3H), 1.40 (s, 3H), 1.31 (s, 3H), 1.16 (s, 3H);  $^{13}\text{C}$  NMR (126 MHz, Chloroform- $d$ )  $\delta$  139.1, 138.7, 138.3, 138.2, 138.0, 128.6, 128.45, 128.42, 128.40, 128.39, 128.1, 128.0, 127.91, 127.89, 127.8, 127.68, 127.65, 127.61, 127.3, 112.0, 109.2, 105.4, 98.0, 97.0, 84.1, 81.3, 80.8, 79.7, 79.4, 78.7, 78.2, 75.7, 74.2, 73.4, 73.1, 73.0, 72.8, 72.4, 66.7, 60.5, 60.3, 27.2, 27.0, 26.5, 25.4; HRMS (ESI $^+$ ) $^+$  calcd for  $\text{C}_{57}\text{H}_{66}\text{NaO}_{14}$  [M+Na] $^+$ : 997.4350, found: 997.4307.

**2,3,4-tri-O-acetyl-D-xylopyranoside-( $\alpha$ 1-3)-2,4-di-O-acetyl-D-xylopyranoside-( $\alpha$ 1-3)-1,2:5,6-di-O-isopropylidene- $\alpha$ -D-glucufuranose (**13**)**

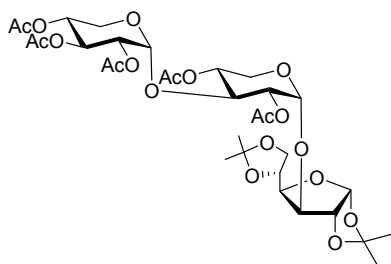

A solution of trisaccharide **12 $\alpha$ - $\alpha$**  (350 mg, 359  $\mu$ mol) in MeOH (10 mL) was degassed with Argon. A catalytic amount of Pd/C (40 mg, 35.9  $\mu$ mol, 10wt%) was added and the atmosphere was exchanged to  $\text{H}_2$ . The reaction was stirred for 4 days obtaining full conversion ( $R_f$  = 0.15 (1:9 MeOH:DCM)) and was subsequently filtered over Celite and concentrated *in vacuo*. The residue was dissolved in pyridine (10 mL) and  $\text{Ac}_2\text{O}$  (406  $\mu$ L, 4.31 mmol) was added as well as a catalytic amount of DMAP (4.4 mg, 36  $\mu$ mol). The reaction was stirred overnight and subsequently concentrated *in vacuo*. The residue was taken up in EtOAc, washed with sat. aq.  $\text{CuSO}_4$ , sat. aq.  $\text{NaHCO}_3$  and sat. aq. NaCl. The organic layer was dried

over  $\text{MgSO}_4$  and concentrated *in vacuo*. The resulting residue was purified with column chromatography (0-50% EtOAc in heptane) resulting in the acetylated trisaccharide **13** as a white foam in 81% yield (214 mg, 291  $\mu$ mol).  $R_f$  = 0.23 (1:1 EtOAc:heptane);  $^1\text{H}$  NMR (500 MHz, Chloroform- $d$ )  $\delta$  5.94 (d,  $J$  = 3.6 Hz, 1H), 5.42 – 5.33 (m, 2H), 5.27 (d,  $J$  = 3.7 Hz, 1H), 5.07 – 4.94 (m, 2H), 4.86 (dd,  $J$  = 10.1, 3.7 Hz, 1H), 4.74 (dd,  $J$  = 10.3, 3.7 Hz, 1H), 4.60 (d,  $J$  = 3.6 Hz, 1H), 4.30 – 4.25 (m, 1H), 4.21 – 4.06 (m, 5H), 3.88 – 3.76 (m, 3H), 3.48 (t,  $J$  = 10.8 Hz, 1H), 2.11 (s, 3H), 2.10 (s, 3H), 2.06 (s, 3H), 2.04 (s, 3H), 2.03 (s, 3H), 1.52 (s, 3H), 1.43 – 1.40 (m, 3H), 1.35 – 1.32 (m, 6H);  $^{13}\text{C}$  NMR (126 MHz, Chloroform- $d$ )  $\delta$  170.5, 169.9, 169.8, 169.5, 112.2, 109.5, 105.2, 97.3, 95.4, 83.8, 81.5, 81.1, 72.6, 72.3, 71.7, 71.5, 71.1, 69.13, 69.11, 67.4, 58.9, 58.5, 27.1, 26.9, 26.3, 25.4, 20.84, 20.84, 20.73, 20.67, 20.6; HRMS (ESI $^+$ ): calcd for  $\text{C}_{32}\text{H}_{46}\text{NaO}_{19}$  [M+Na] $^+$ : 757.2531, found: 757.2521.

**D-xylose-( $\alpha$ 1-3)-D-xylose-( $\alpha$ 1-3)-D-glucopyranose (**2**)**

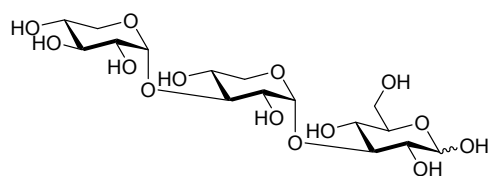

Acetylated trisaccharide **12** (200 mg, 272  $\mu$ mol) was dissolved in AcOH:H $_2$ O (100 mL, 8:2) and the resulting solution was heated to 95  $^\circ\text{C}$  overnight. The solution was allowed to cool to rt, the solvent was removed *in vacuo*. The residue was dissolved in pyridine (5 mL) and  $\text{Ac}_2\text{O}$  (385  $\mu$ L, 4.08 mmol) was added as well as a catalytic amount of DMAP (3.3 mg, 27  $\mu$ mol). The reaction was stirred overnight and subsequently

concentrated *in vacuo*. The residue was taken up in EtOAc, washed with sat. aq.  $\text{CuSO}_4$ , sat. aq.  $\text{NaHCO}_3$  and sat. aq. NaCl. The organic layer was dried over  $\text{MgSO}_4$  and concentrated *in vacuo*. The resulting residue was purified with column chromatography (40-70% EtOAc in heptane) resulting in a white foam contaminated with an inseparable peracetylated glucose ( $R_f$  = 0.51 (8:2 EtOAc:heptane)). The mixture was dissolved in MeOH (5 mL) and solid  $\text{K}_2\text{CO}_3$  (10 mg) was added. The solution was stirred for 2 h, neutralized with Amberlyst (15 hydrogen form), filtered and concentrated *in vacuo*. The mixture was purified by column chromatography (0-20% H $_2$ O in MeCN) and subsequent gel filtration chromatography (Biorad P2 gel). The product was lyophilized to obtain **2** as a fluffy white solid in 35% yield (43 mg, 97  $\mu$ mol).  $R_f$  = 0.18 (1:4 H $_2$ O:MeCN);  $^1\text{H}$  NMR (500 MHz, D $_2$ O)  $\delta$  5.38 – 5.32 (m, 2H), 5.26 (d,  $J$  = 3.8 Hz, 0.4H), 4.68 (d,  $J$  = 8.0 Hz, 0.6H), 3.95 – 3.60 (m, 14.4H), 3.57 (dd,  $J$  = 9.6, 3.8 Hz, 1H), 3.49 (ddd,  $J$  = 9.6, 5.8, 2.3 Hz, 0.6H), 3.37 (dd,  $J$  = 8.9, 7.9 Hz, 0.6H);  $^{13}\text{C}$  NMR (126 MHz, D $_2$ O)  $\delta$  99.3, 99.1, 99.0, 96.0, 92.2, 81.9, 79.4, 79.1, 75.6, 73.0, 72.7, 71.6, 71.2, 70.11, 70.05, 70.02, 69.7, 69.4, 61.6, 61.5, 60.5, 60.4; HRMS (ESI $^+$ ) calcd for  $\text{C}_{16}\text{H}_{28}\text{NaO}_{14}$  [M+Na] $^+$ : 467.1378, found: 467.1395.





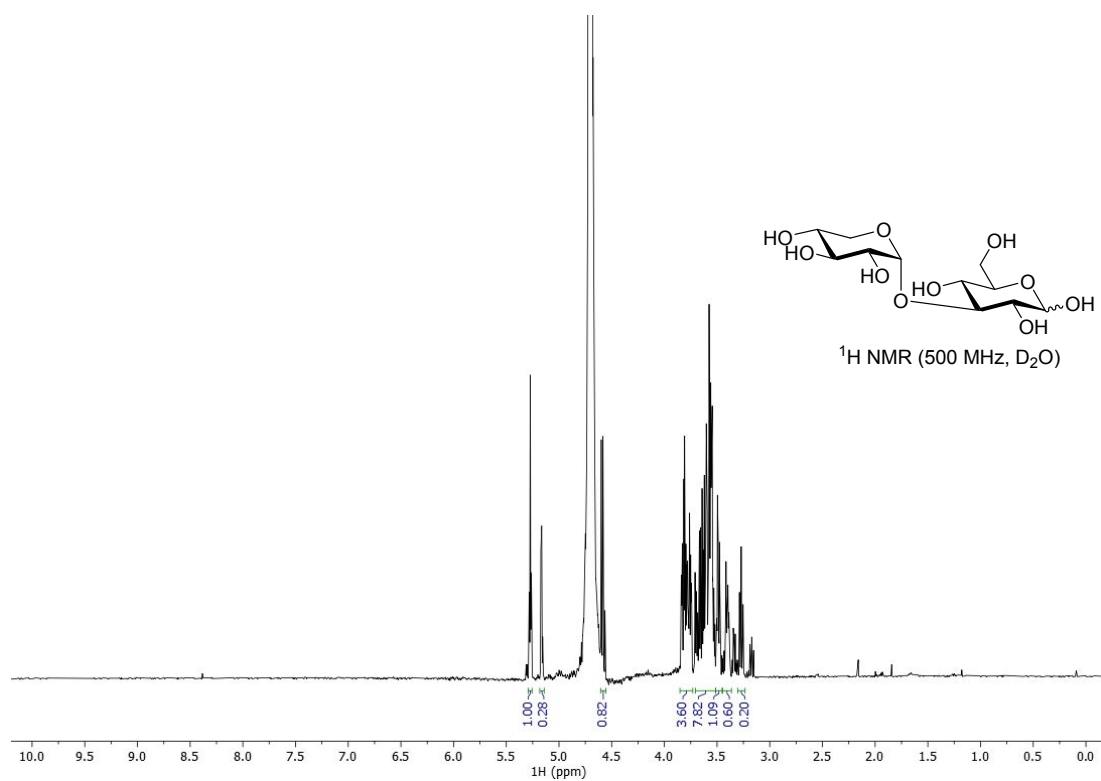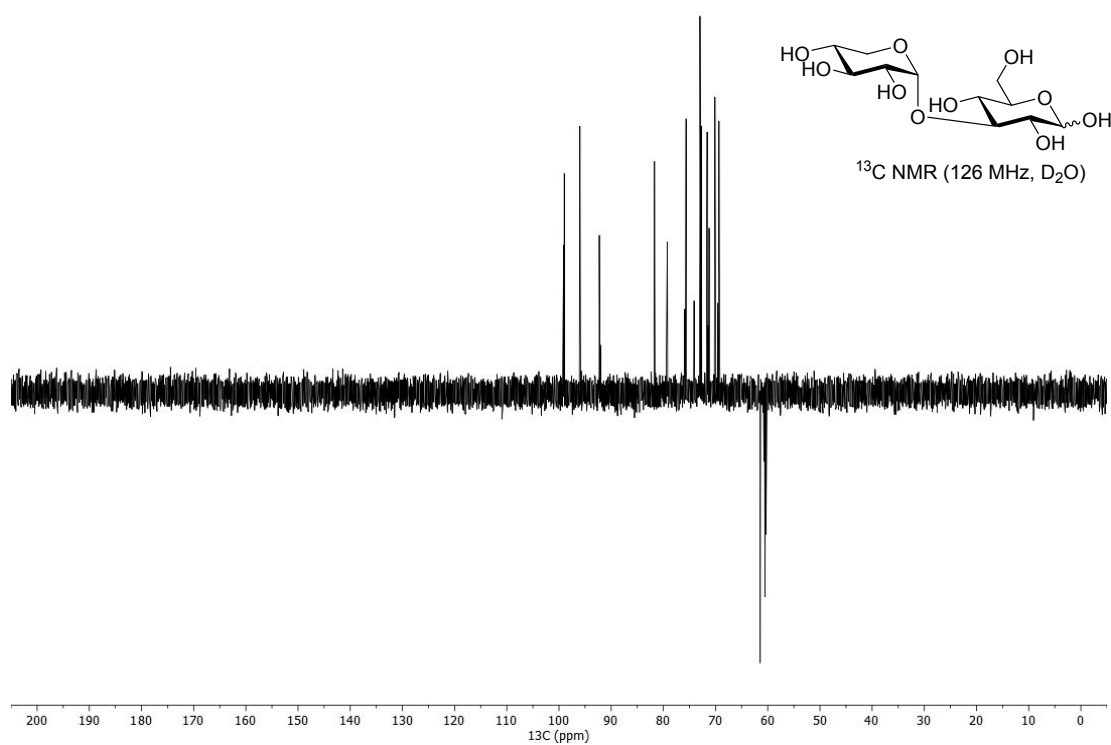

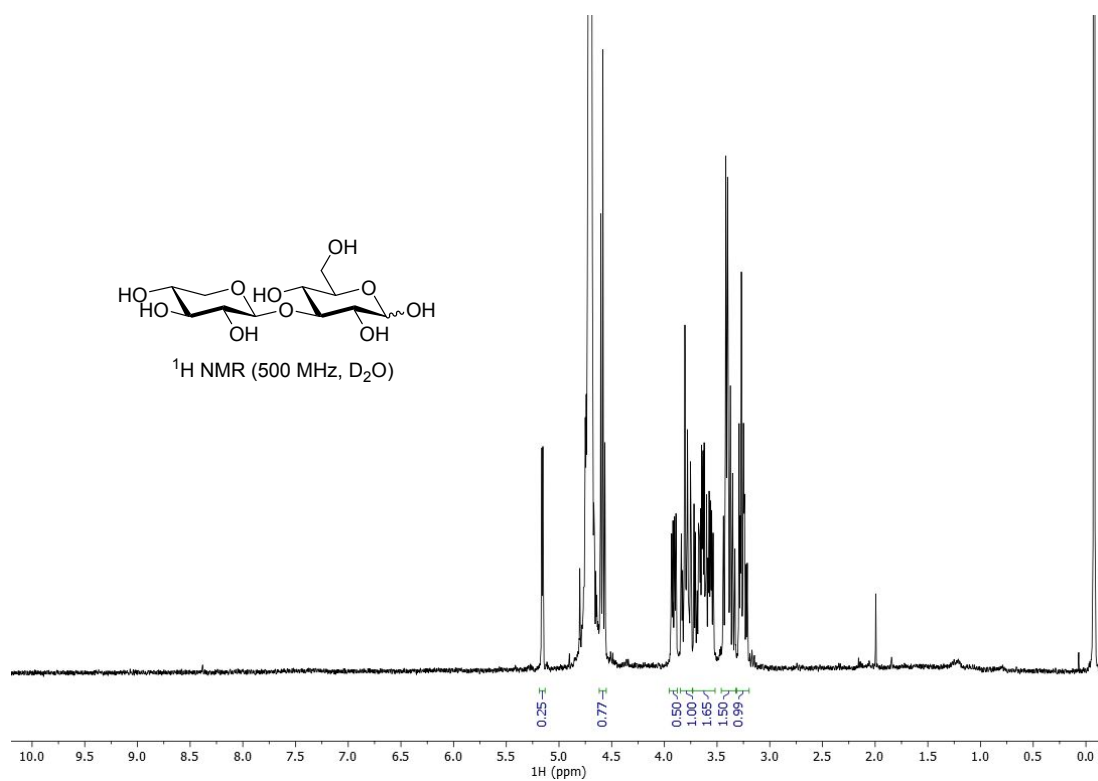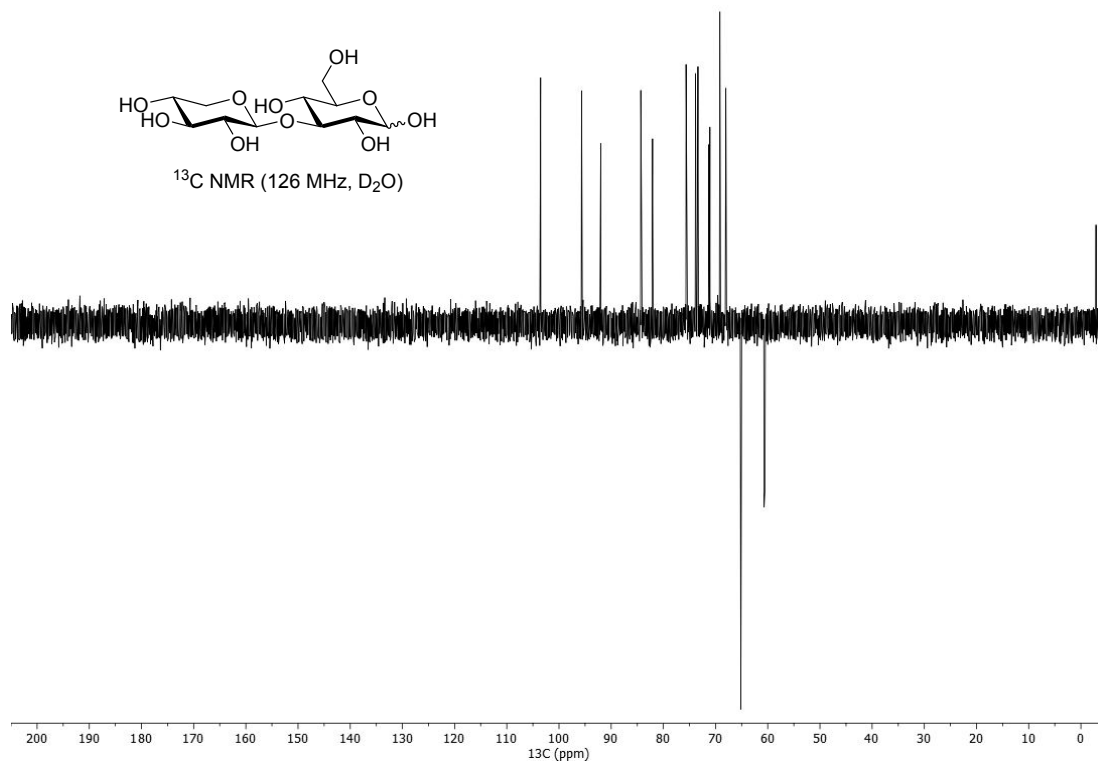

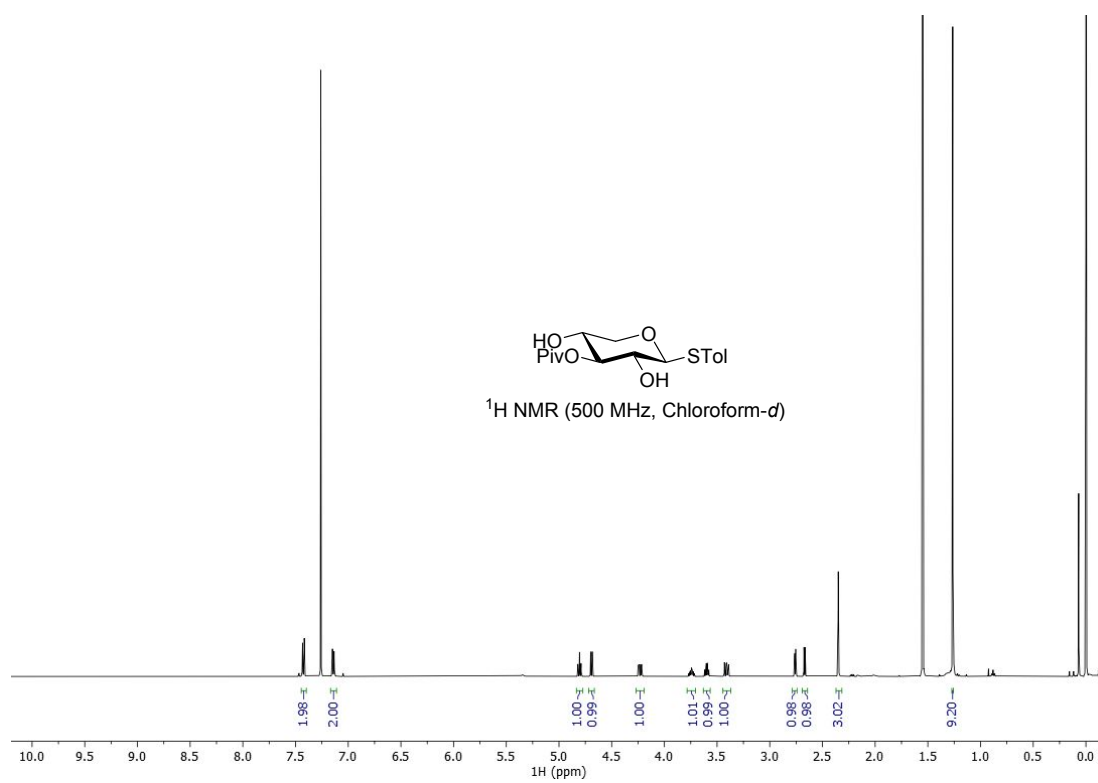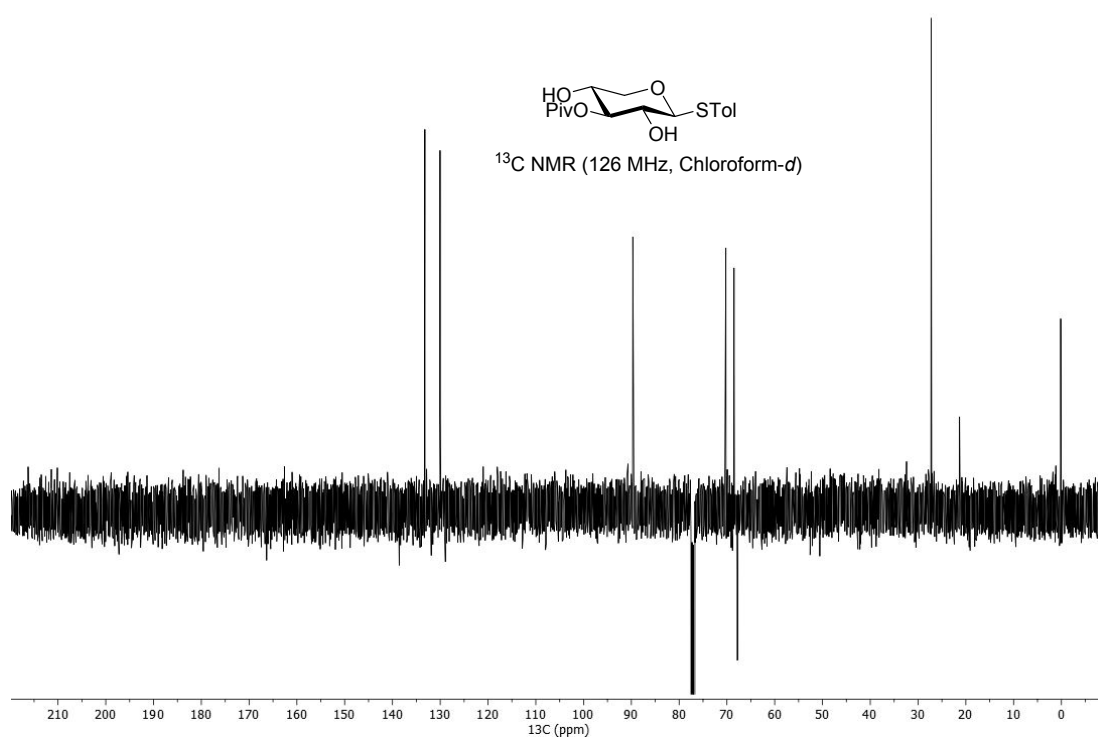

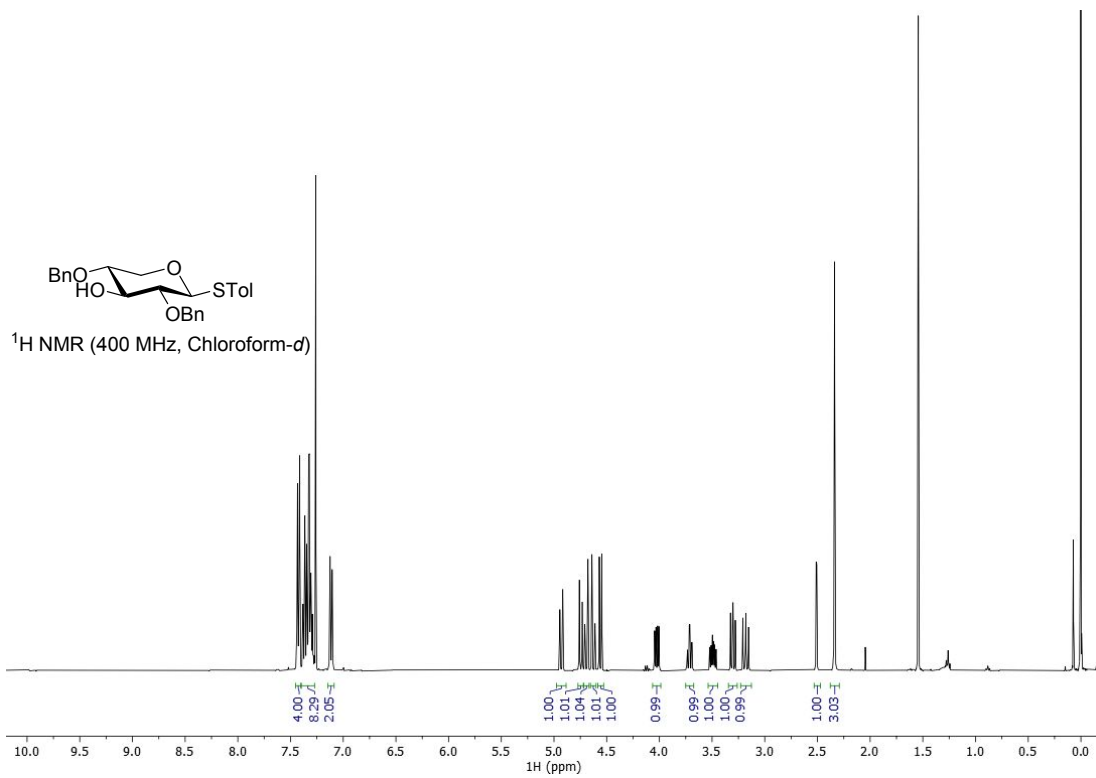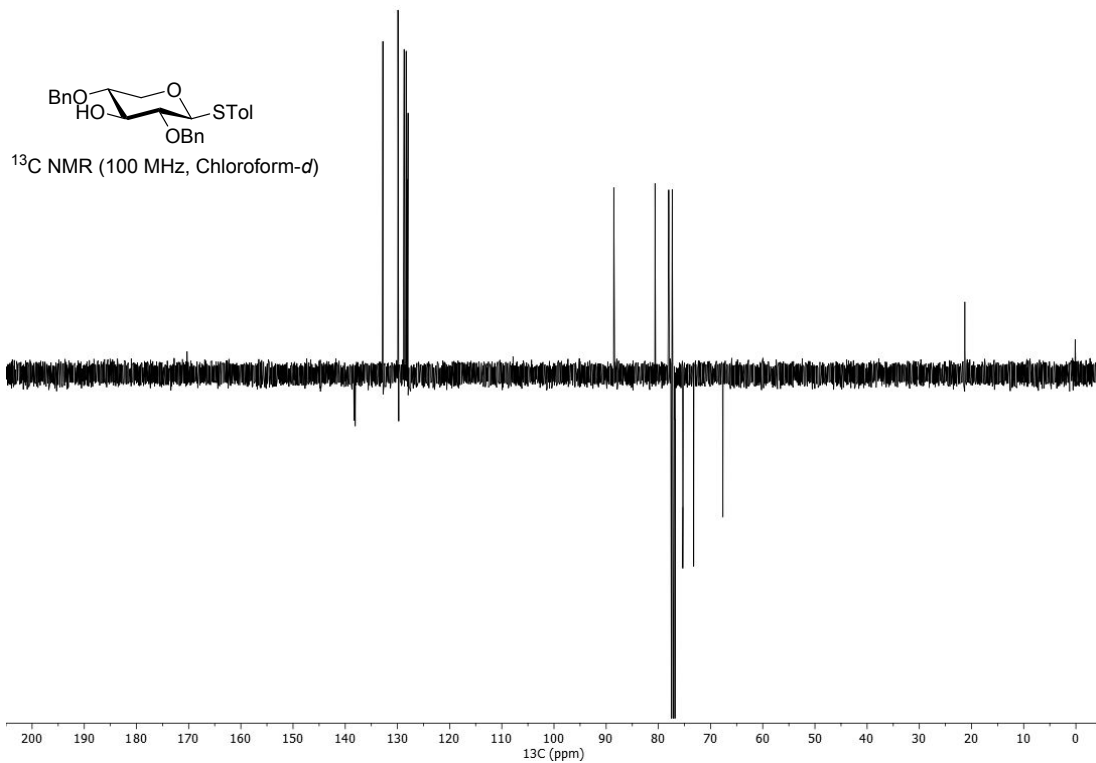

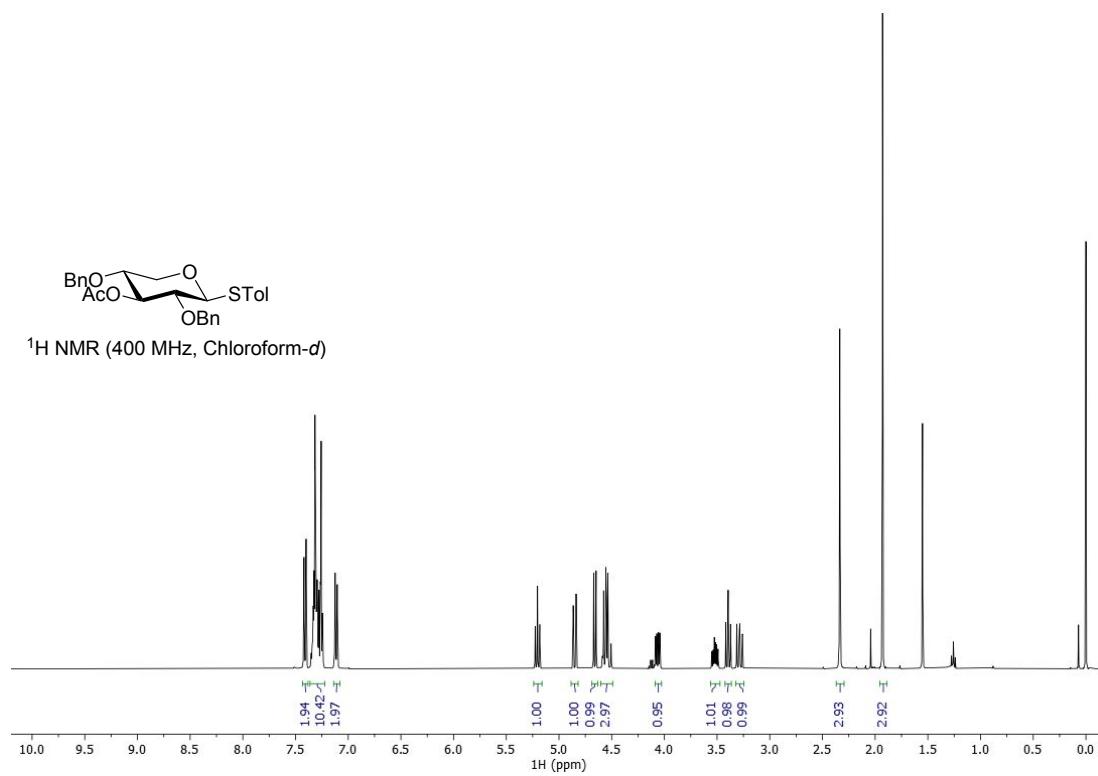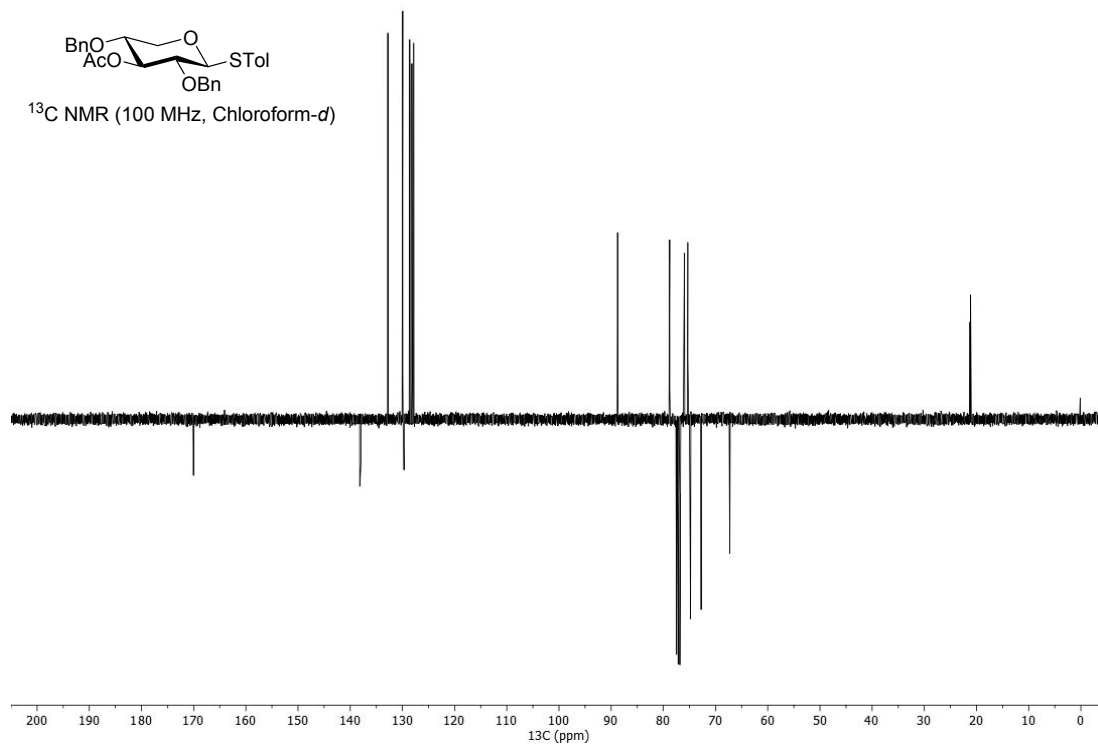



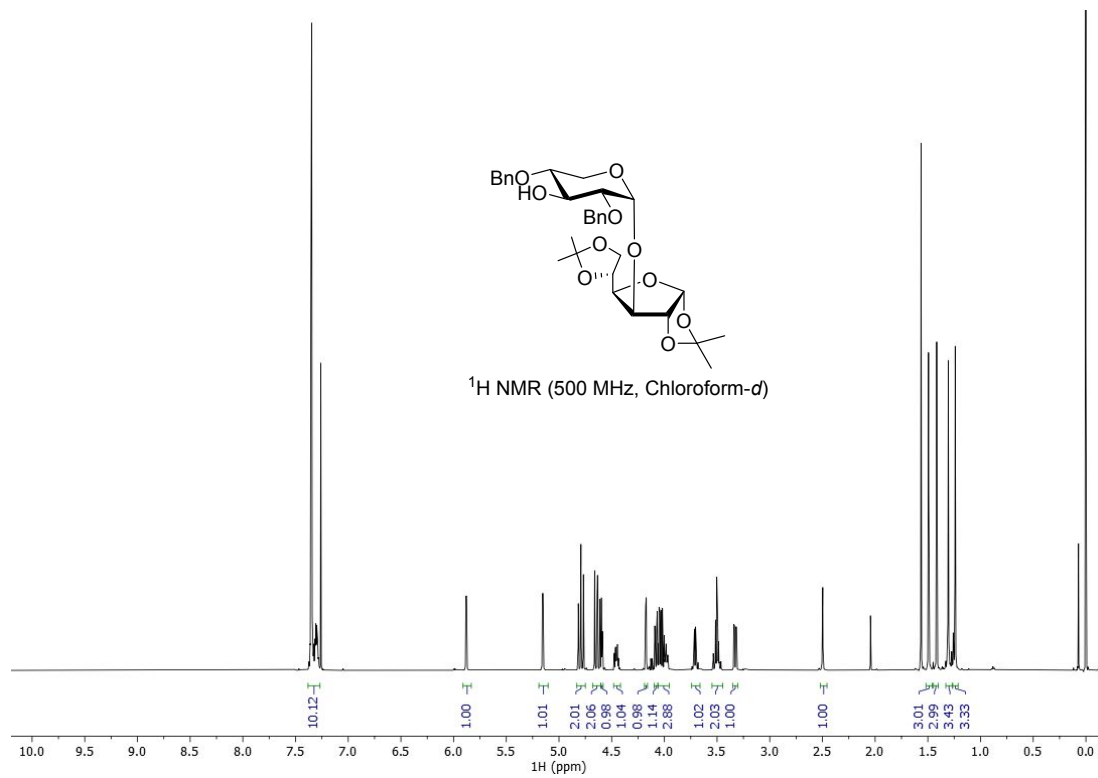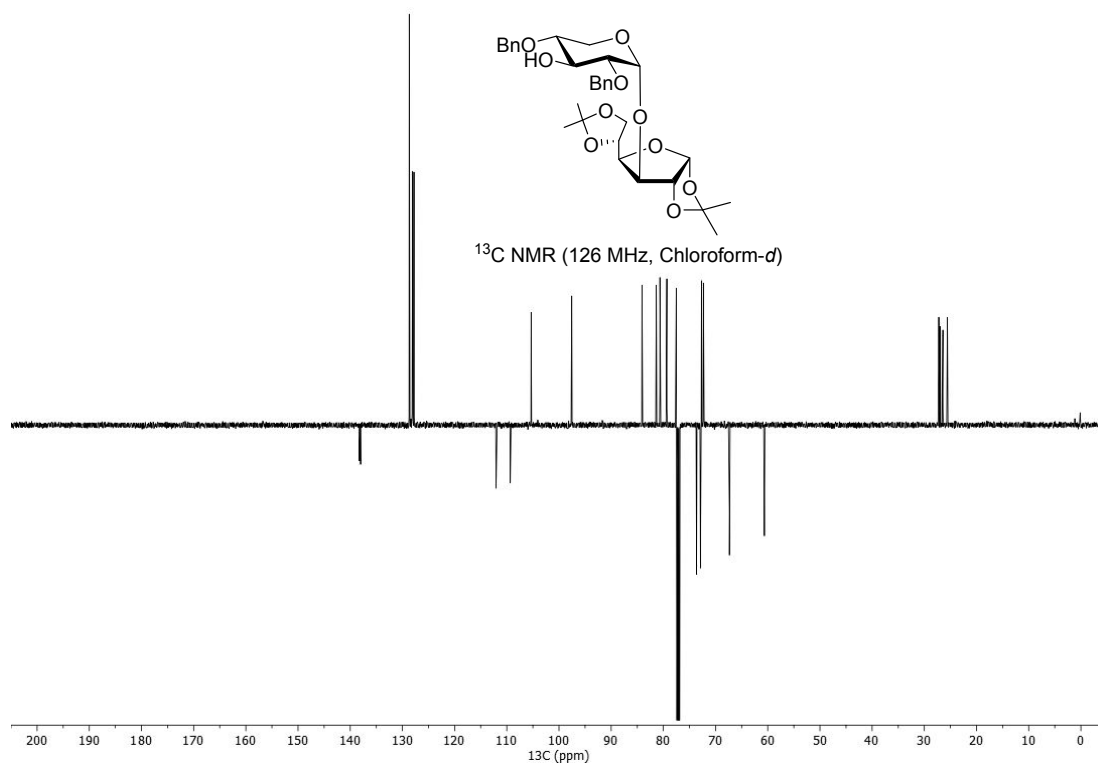

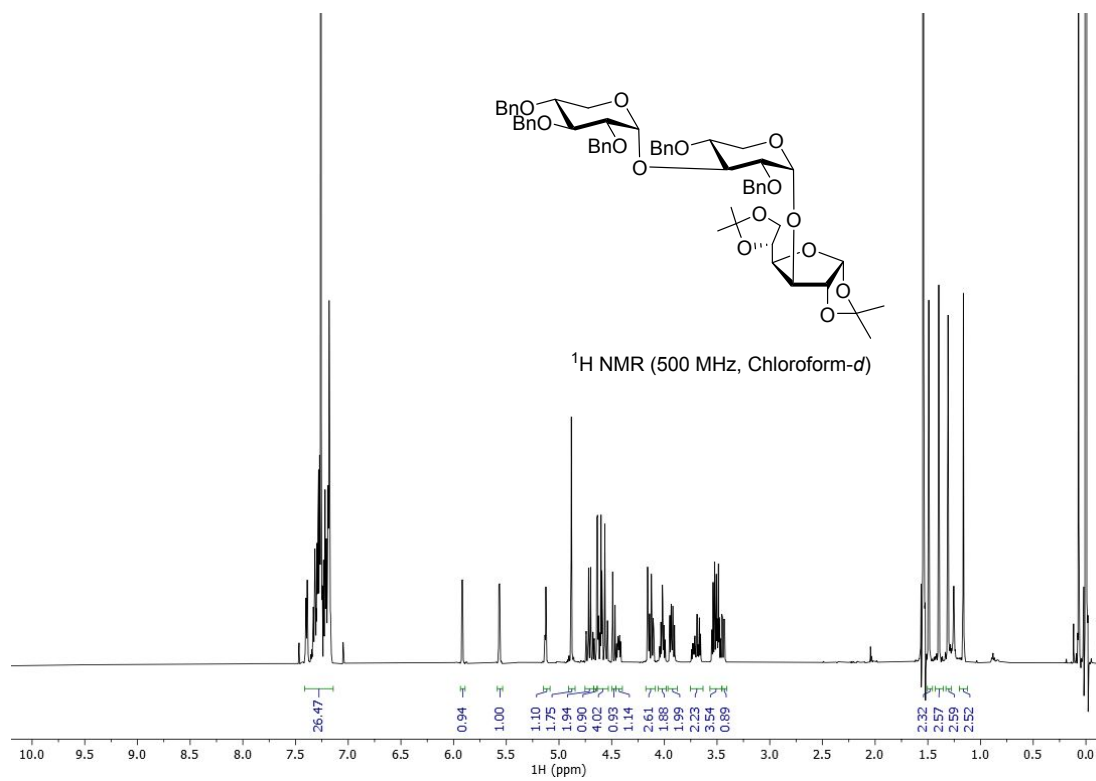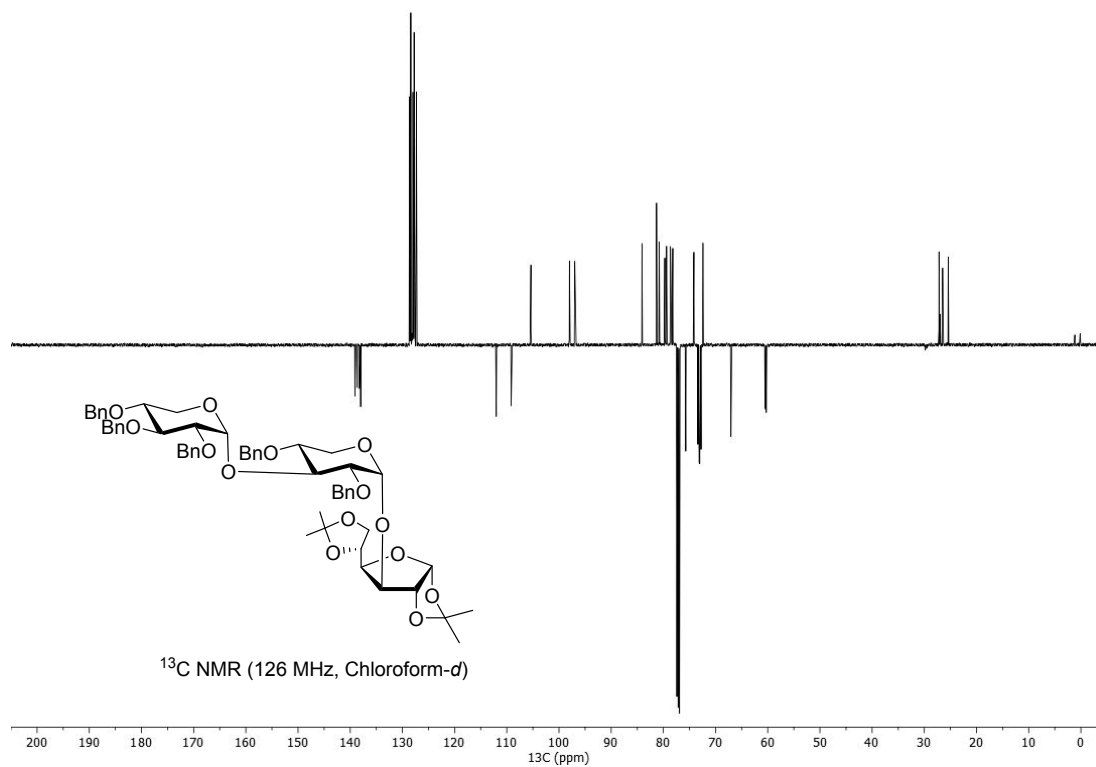

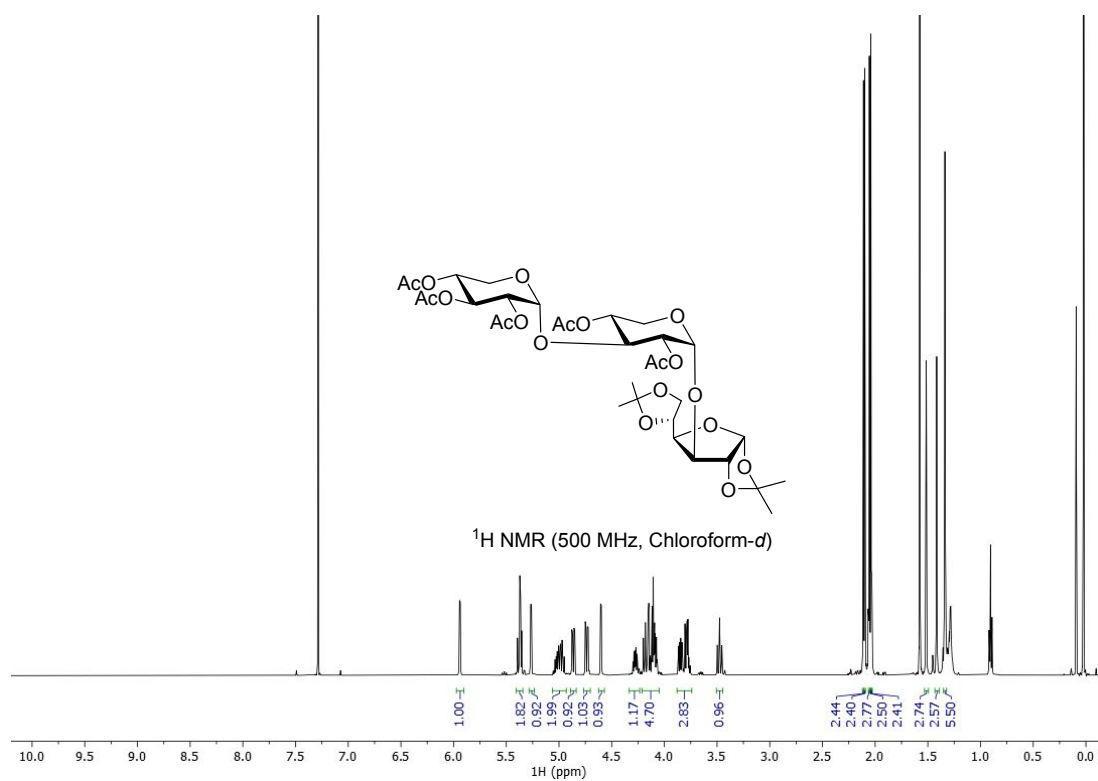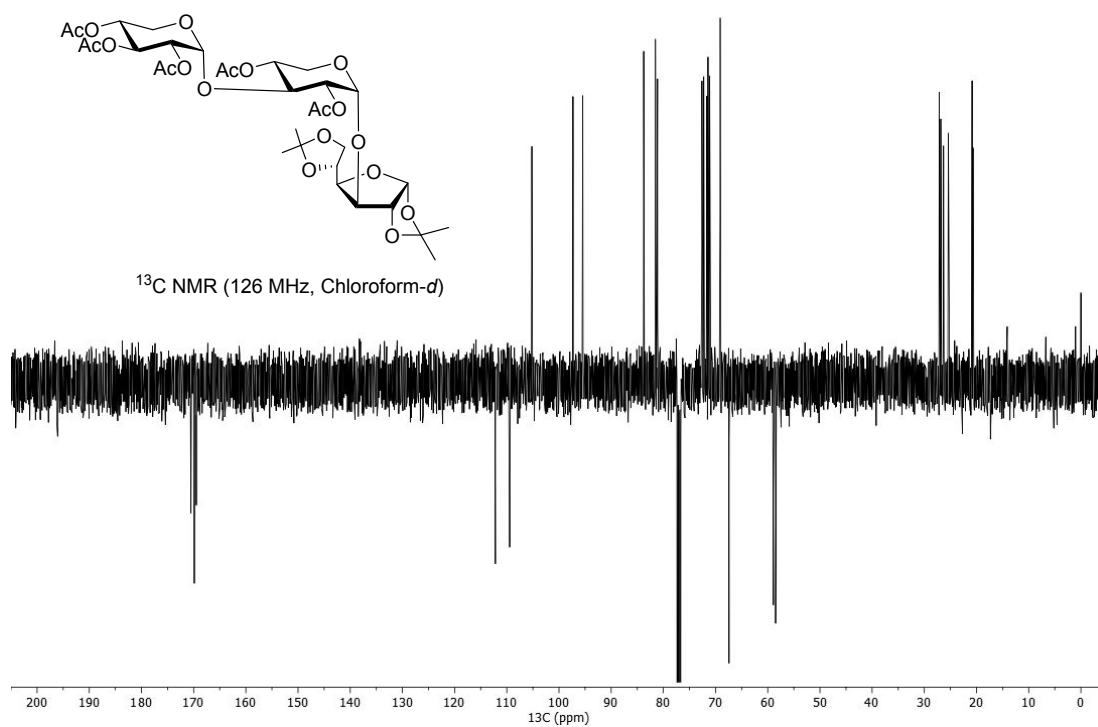

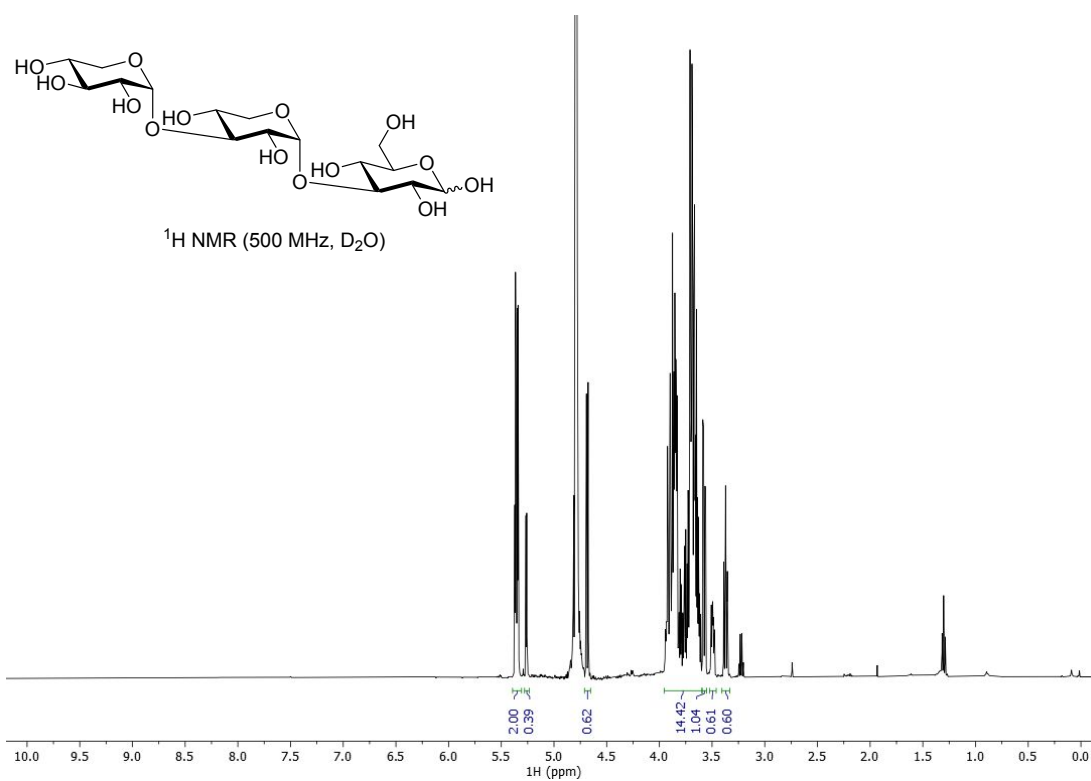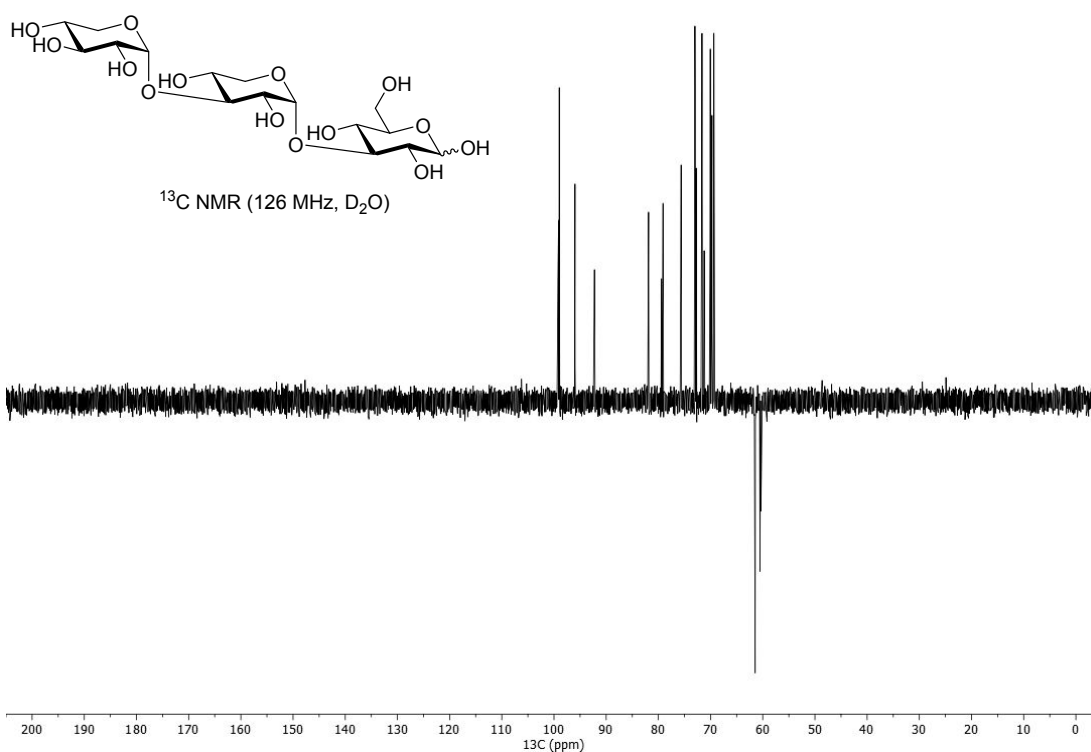

1. De Praeter, C. M.; Gerwig, G. J.; Bause, E.; Nuytinck, L. K.; Vliegthart, J. F. G.; Breuer, W.; Kamerling, J. P.; Espeel, M. F.; Martin, J.-J. R.; De Paepe, A. M.; Chan, N. W. C.; Dacremont, G. A.; Van Coster, R. N., A Novel Disorder Caused by Defective Biosynthesis of

N-Linked Oligosaccharides Due to Glucosidase I Deficiency. *The American Journal of Human Genetics* **2000**, *66*(6), 1744-1756.

2. Jansen, G.; Muskiet, F. A. J.; Schierbeek, H.; Berger, R.; van der Slik, W., Capillary gas chromatographic profiling of urinary, plasma and erythrocyte sugars and polyols as their trimethylsilyl derivatives, preceded by a simple and rapid prepurification method. *Clinica Chimica Acta* **1986**, *157*(3), 277-293.

3. Berden, G.; Derksen, M.; Houthuijs, K. J.; Martens, J.; Oomens, J., An automatic variable laser attenuator for IRMPD spectroscopy and analysis of power-dependence in fragmentation spectra. *International Journal of Mass Spectrometry* **2019**, *443*, 1-8.

4. Frisch, M. J.; Trucks, G. W.; Schlegel, H. B.; Scuseria, G. E.; Robb, M. A.; Cheeseman, J. R.; Scalmani, G.; Barone, V.; Petersson, G. A.; Nakatsuji, H.; Li, X.; Caricato, M.; Marenich, A. V.; Bloino, J.; Janesko, B. G.; Gomperts, R.; Mennucci, B.; Hratchian, H. P.; Ortiz, J. V.; Izmaylov, A. F.; Sonnenberg, J. L.; Williams-Young, D.; Ding, F.; Lipparini, F.; Egidi, F.; Goings, J.; Peng, B.; Petrone, A.; Henderson, T.; Ranasinghe, D.; Zakrzewski, V. G.; Gao, J.; Rega, N.; Zheng, G.; Liang, W.; Hada, M.; Ehara, M.; Toyota, K.; R. Fukuda, R.; Hasegawa, J.; Ishida, M.; Nakajima, T.; Honda, Y.; Kitao, O.; Nakai, H.; Vreven, T.; Throssell, K.; Montgomery Jr., J. A.; Peralta, J. E.; Ogliaro, F.; Bearpark, M. J.; Heyd, J. J.; Brothers, E. N.; Kudin, K. N.; Staroverov, V. N.; Keith, T. A.; Kobayashi, R.; Normand, J.; Raghavachari, K.; Rendell, A. P.; Burant, J. C.; Iyengar, S. S.; Tomasi, J.; Cossi, M.; Millam, J. M.; Klene, M.; Adamo, C.; Cammi, R.; Ochterski, J. W.; Martin, R. L.; Morokuma, K.; Farkas, O.; Foresman, J. B.; Fox, D. J., Gaussian 16, Revision A. 03. Gaussian, Inc. Wallingford, CT: 2016.

5. van Outersterp, R. E.; Houthuijs, K. J.; Berden, G.; Engelke, U. F.; Kluijtmans, L. A. J.; Wevers, R. A.; Coene, K. L. M.; Oomens, J.; Martens, J., Reference-standard free metabolite identification using infrared ion spectroscopy. *International Journal of Mass Spectrometry* **2019**, *443*, 77-85.
